# Supplementary material for: Phase-interface-anchored cadmium single-atom catalysts for efficient methanol steam reforming
Source: Research Square preprint supplement (doi:10.21203/rs.3.rs-5524438/v1), 2025-01-05
Supplement: Supplementary file 1 [file 89780e87c2fe2a10945fe449.pdf]

## **Supplementary Information**

### **Phase-interface-anchored cadmium single-atom catalysts for efficient methanol steam reforming**

Shunan Zhang<sup>1</sup>, Haozhi Zhou<sup>1</sup>, Zilong Shao<sup>2</sup>, Baohuan Wei<sup>3</sup>, Zhen Hu<sup>3</sup>, Hao Liang<sup>1</sup>,  
Ruonan Zhang<sup>1</sup>, Xiaofang Liu<sup>2</sup>, Hu Luo<sup>2</sup>, Lin Xia<sup>2</sup>, Yuhan Sun<sup>1,3</sup>, Hui Wang<sup>1,2\*</sup>

<sup>1</sup> Institute of Carbon Neutrality, ShanghaiTech University, Shanghai 201203, PR China

<sup>2</sup> CAS Key Laboratory of Low-Carbon Conversion Science and Engineering, Shanghai  
Advanced Research Institute, Chinese Academy of Sciences, Shanghai 201210, PR China

<sup>3</sup> Shanghai Institute of Clean Technology, Shanghai 201620, P. R. China

\*Corresponding author. Tel: +86-021-20608002, Fax: +86-021-20608066.

E-mail: wanghh@sari.ac.cn (H. Wang);

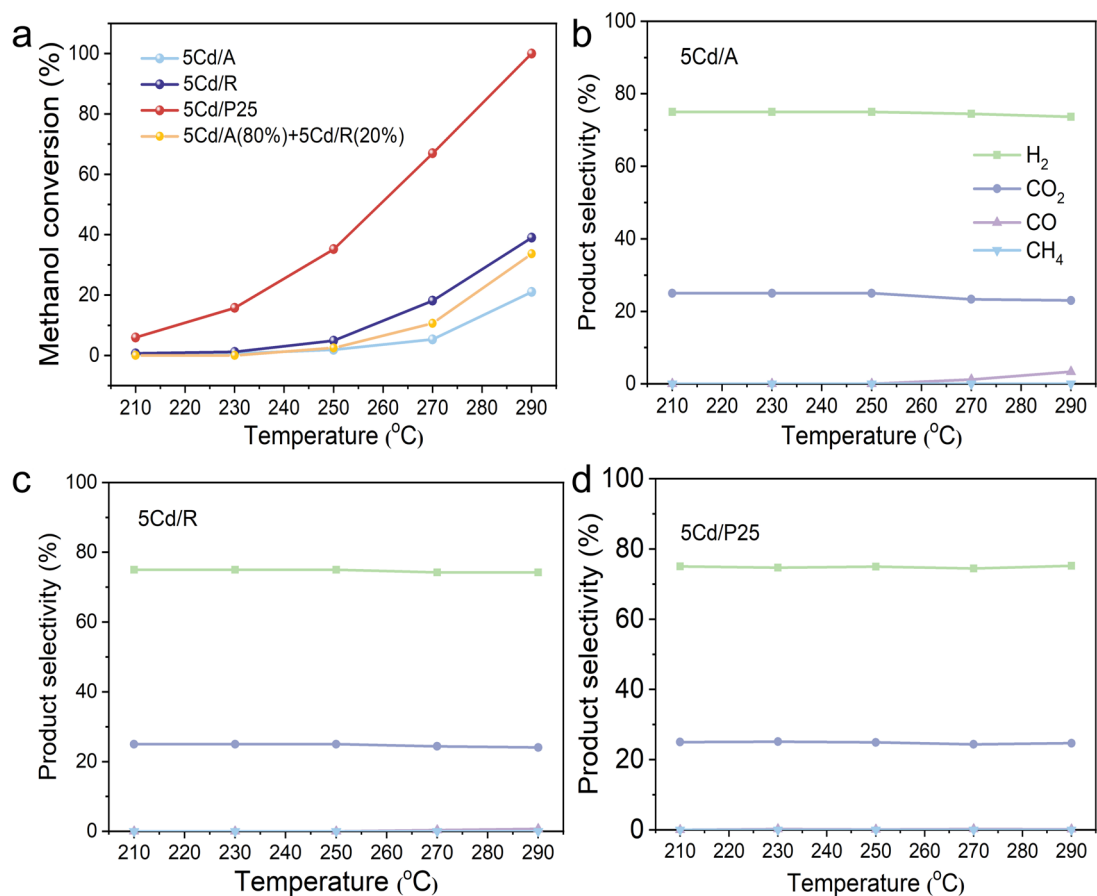

**Fig. S1** Evolution of methanol conversion (**a**) and product selectivity in response to temperature increments for the 5Cd/A (**b**), 5Cd/R (**c**), and 5Cd/P25 (**d**) catalysts. Reaction conditions: 210-290°C, S/C ratio of 3/1, 0.1 MPa pressure, and 3 mL g<sup>-1</sup> h<sup>-1</sup> feed rate.

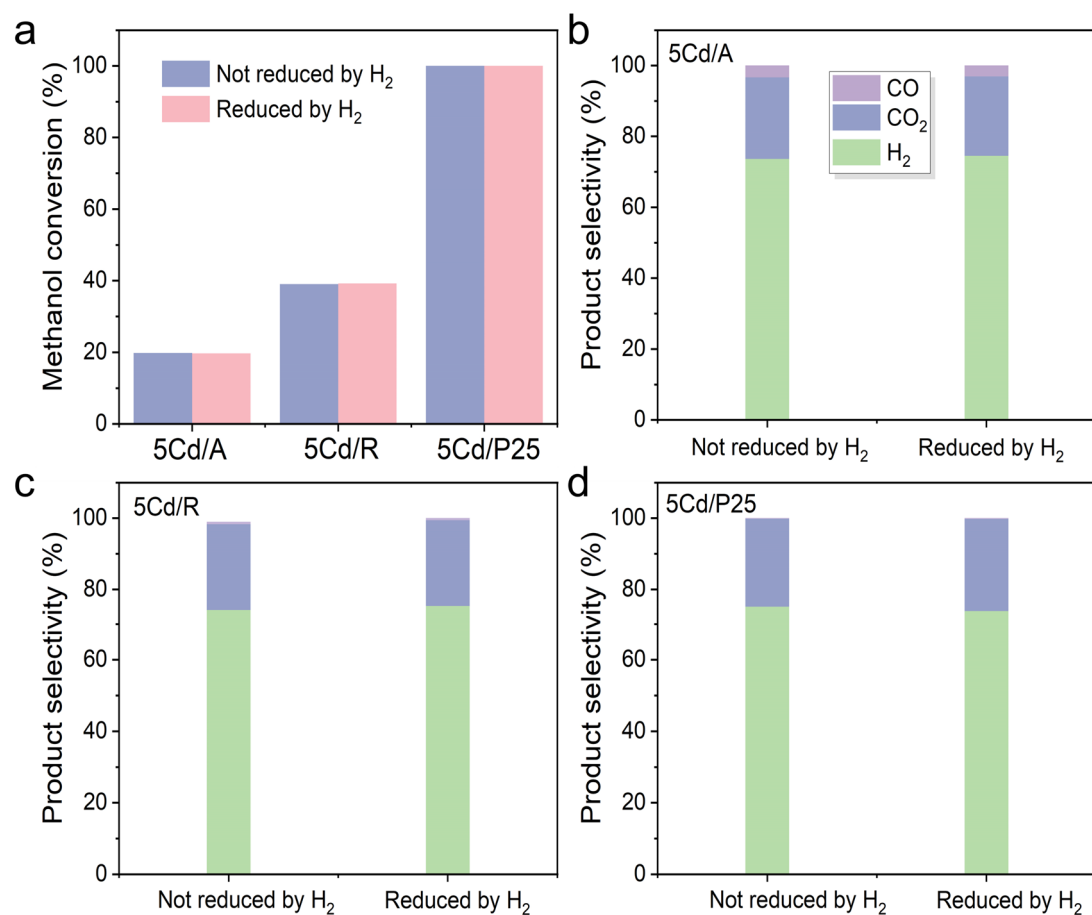

**Fig. S2** Comparative analysis of methanol conversion and product selectivity pre- and post-H<sub>2</sub> reduction. Reduction conditions: 290°C, H<sub>2</sub> (50mL/min), and atmospheric pressure. Reaction conditions: 290°C, S/C ratio of 3/1, 0.1 MPa pressure, and 3 mL g<sup>-1</sup> h<sup>-1</sup> feed rate.

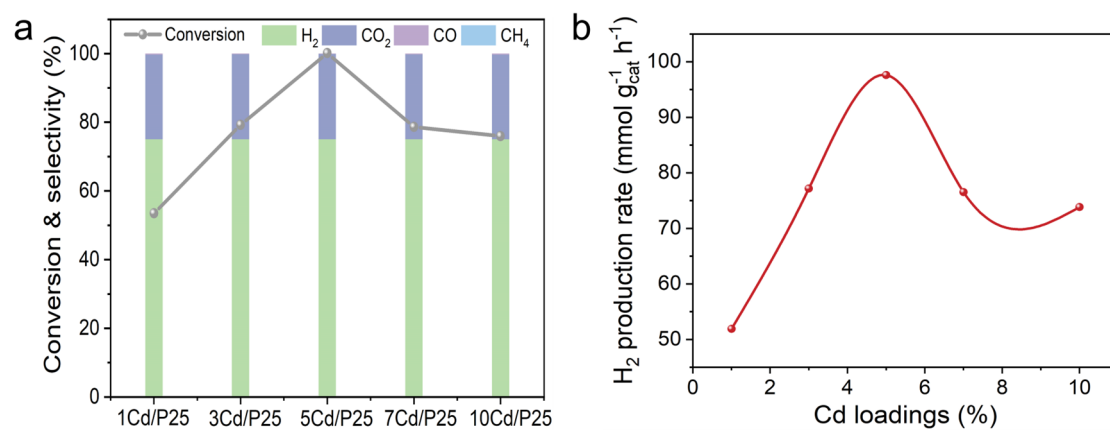

**Fig. S3** Catalytic performance as a function of varying Cd loadings on the P25 support. Reaction conditions: 290°C, S/C ratio of 3/1, 0.1 MPa pressure, and 3 mL g<sup>-1</sup> h<sup>-1</sup> feed rate.



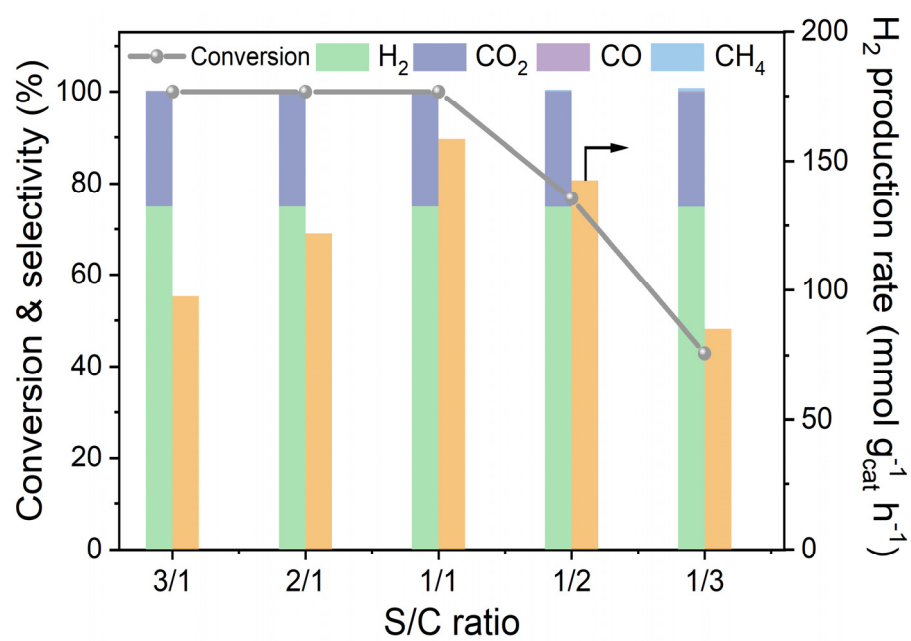

**Fig. S4** Variation in catalytic performance of the 5Cd/P25 catalyst with respect to the S/C ratio. Reaction conditions: 290°C, 0.1 MPa pressure, and 3 mL g<sup>-1</sup> h<sup>-1</sup> feed rate.

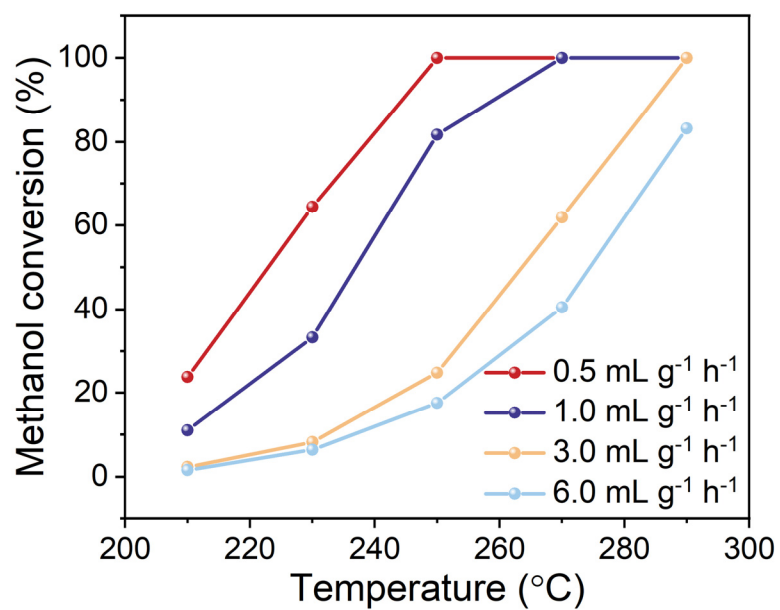

**Fig. S5** Methanol conversion of the 5Cd/P25 catalyst at varying feed rates in conjunction with elevated temperatures. Reaction conditions: 210-290°C, S/C ratio of 1/1, 0.1 MPa pressure, and 0.5-6.0 mL g<sup>-1</sup> h<sup>-1</sup> feed rate.

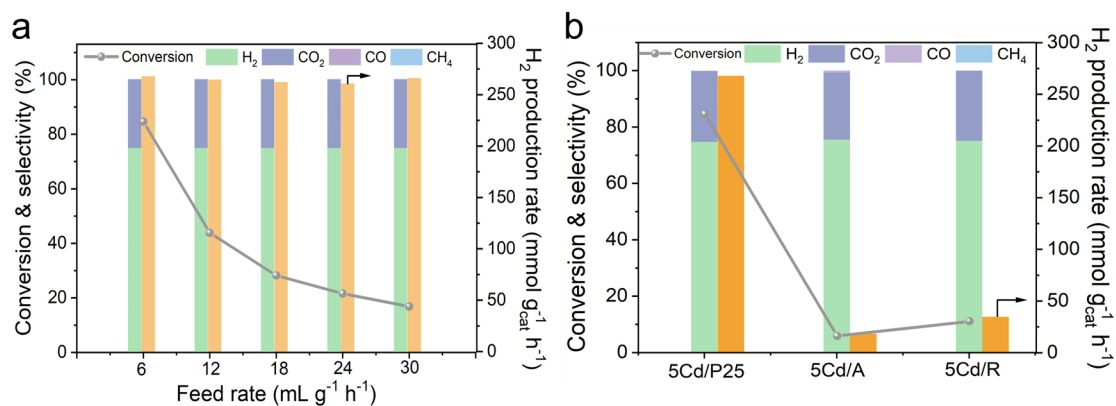

**Fig. S6 (a)** Catalytic performance changes of the 5Cd/P25 catalyst as a function of feed rate. Reaction conditions: 290°C, S/C ratio of 1/1, 0.1 MPa pressure, and 6-30 mL g<sup>-1</sup> h<sup>-1</sup> feed rate. **(b)** Catalytic performance of the 5Cd/P25, 5Cd/A, and 5Cd/R catalysts under the conditions of 290°C, S/C ratio of 1/1, 0.1 MPa pressure, and 6 mL g<sup>-1</sup> h<sup>-1</sup> feed rate.

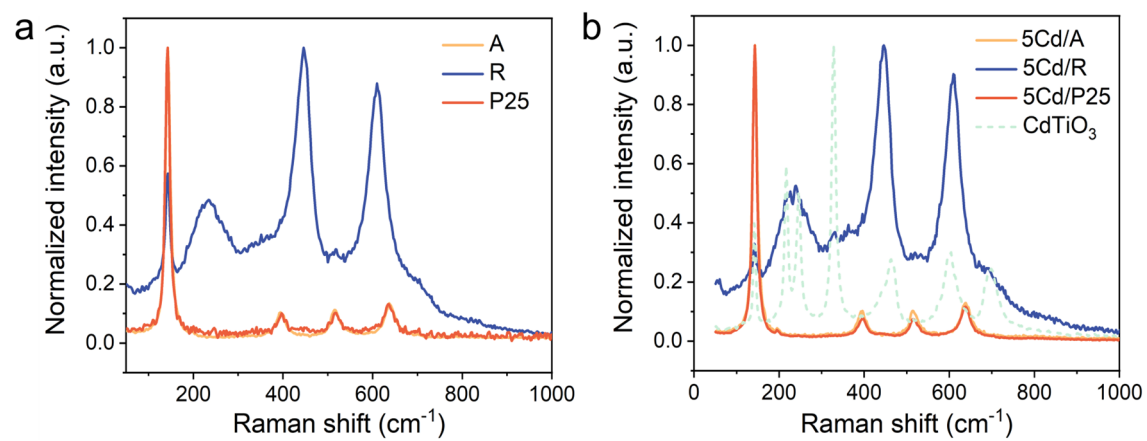

**Fig. S7** Comparative Raman spectroscopy analysis of different support materials (a) and catalysts (b).

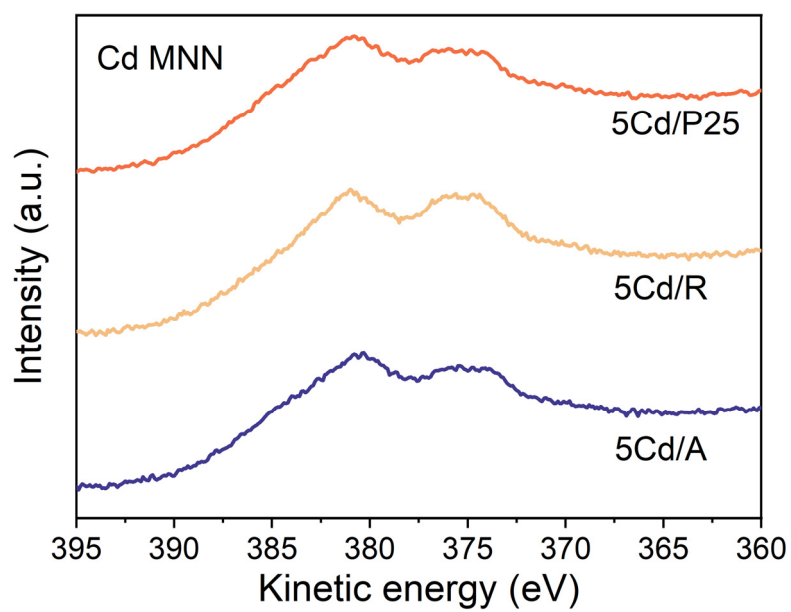

**Fig. S8** AES results for the fresh 5Cd/A, 5Cd/R, and 5Cd/P25 catalysts.

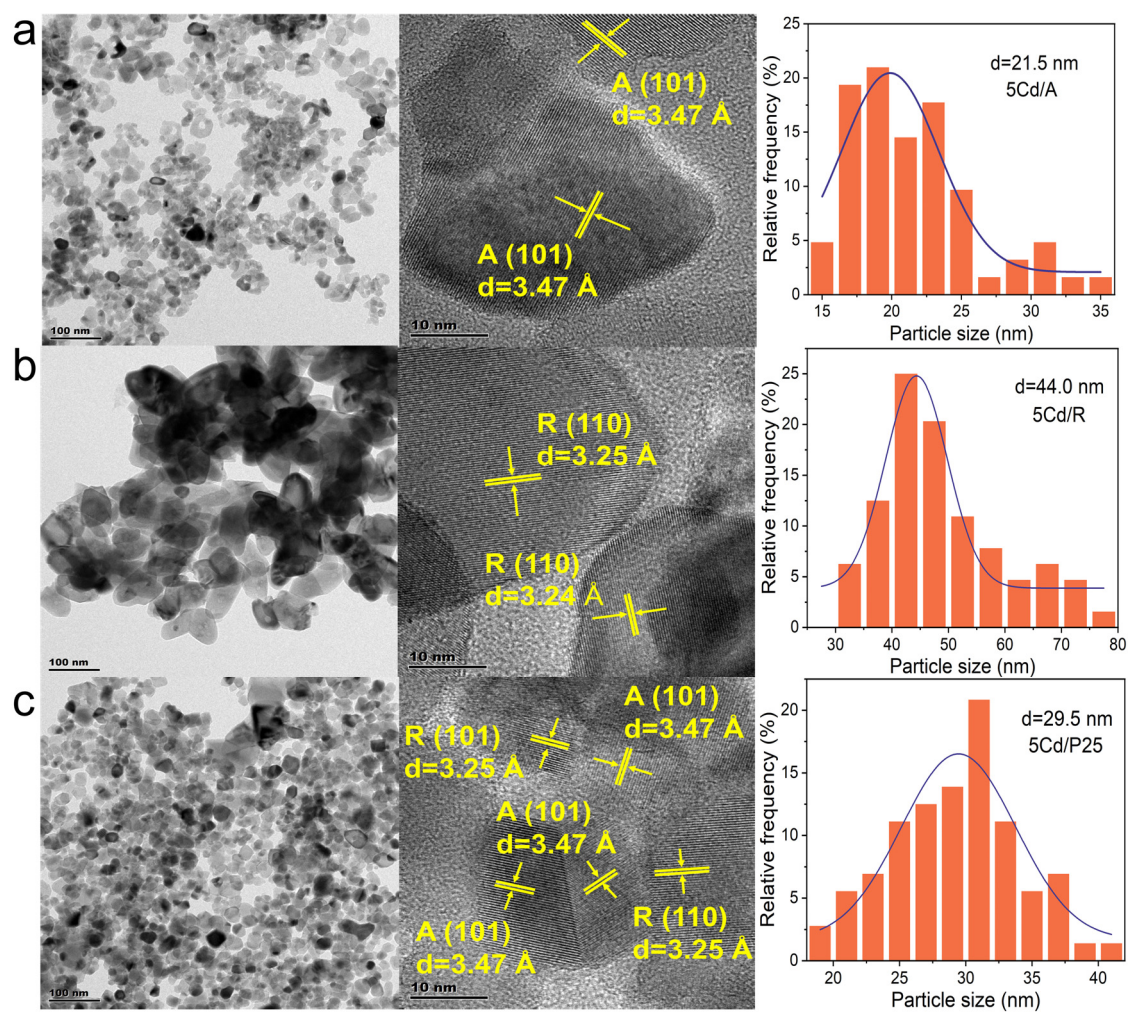

**Fig. S9** TEM and HRTEM images alongside particle size distribution for three catalysts: **(a)** 5Cd/A; **(b)** 5Cd/R; **(c)** 5Cd/P25.

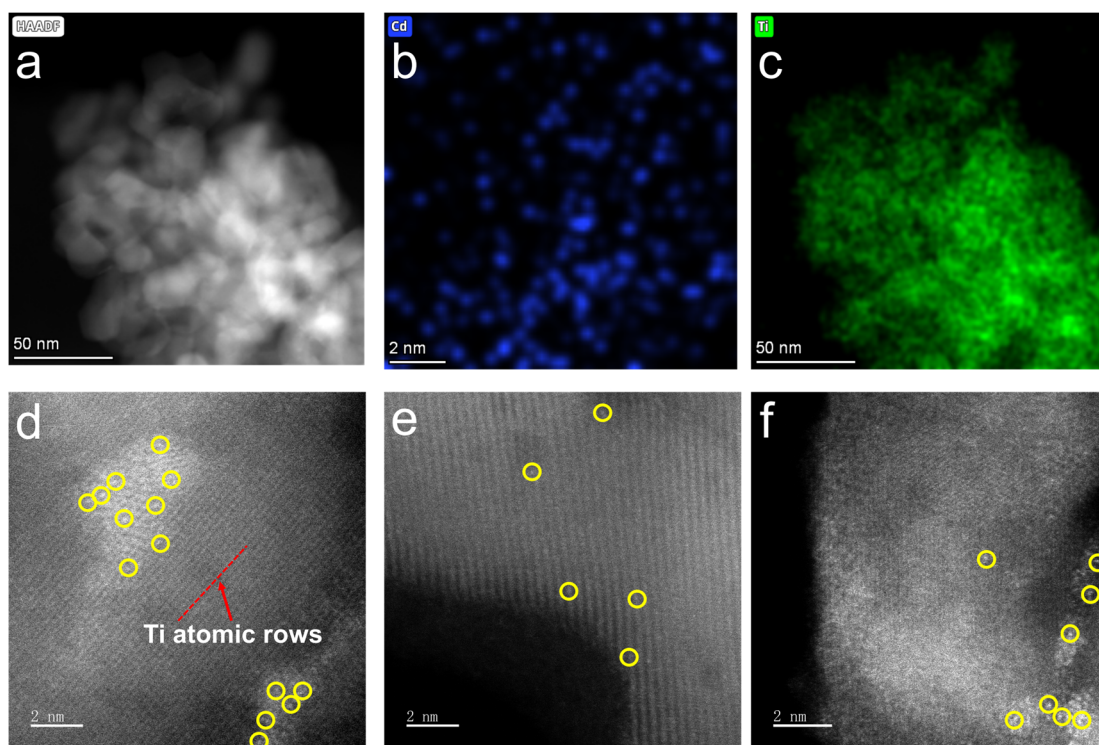

**Fig. S10** EDX mapping (a-c) and HAADF-STEM (d-f) images of the 5Cd/A catalyst. (Cd single atoms were highlighted in yellow).



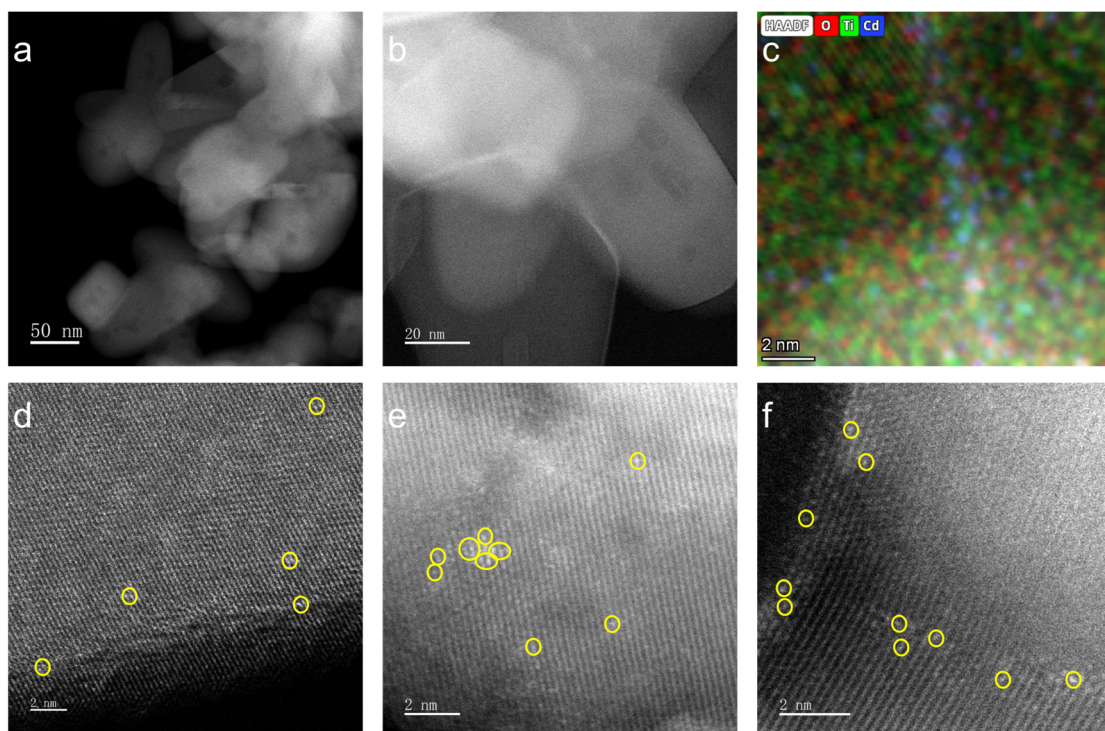

**Fig. S11** EDX mapping (a-c) and HAADF-STEM (d-f) images of the 5Cd/R catalyst. (Cd single atoms were highlighted in yellow).



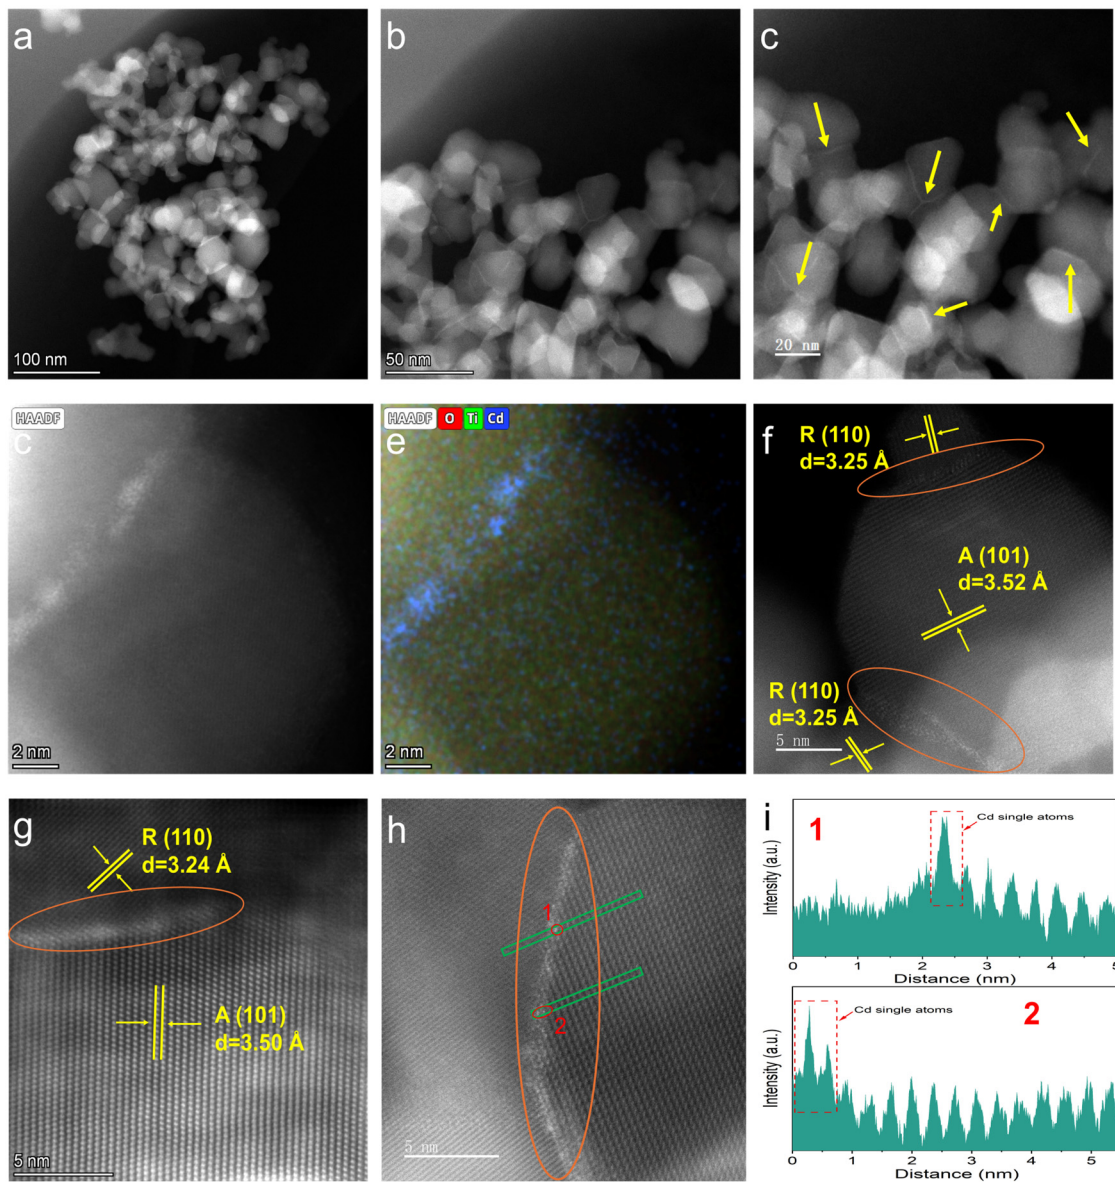

**Fig. S12** (a-c) HAADF-STEM images of the 5Cd/P25 catalyst, scale range 20-100 nm. (d and e) Corresponding EDX mapping images. (f-h) HAADF-STEM images of the 5Cd/P25 catalyst at 5 nm, with Cd single atoms anchored between A (101) and R (110) facets (orange markers). (i) Intensity profiles along the green lines in (h).

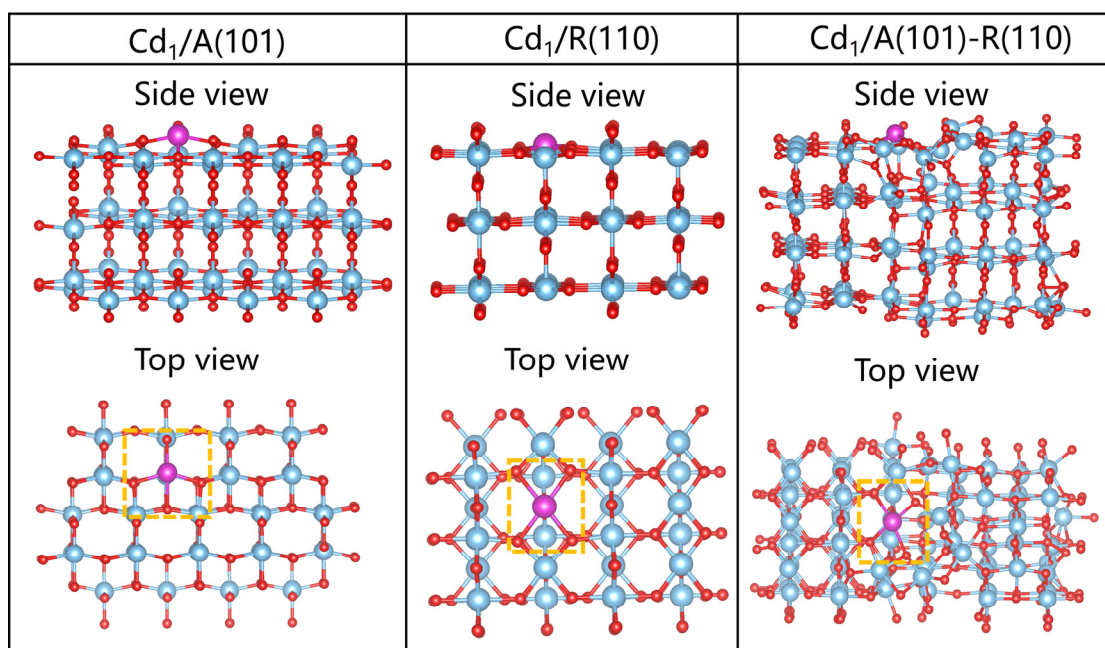

**Fig. S13** DFT-derived models of  $\text{Cd}_1/\text{A}(101)$ ,  $\text{Cd}_1/\text{R}(110)$ , and  $\text{Cd}_1/\text{A}(101)\text{-R}(110)$  interfaces.

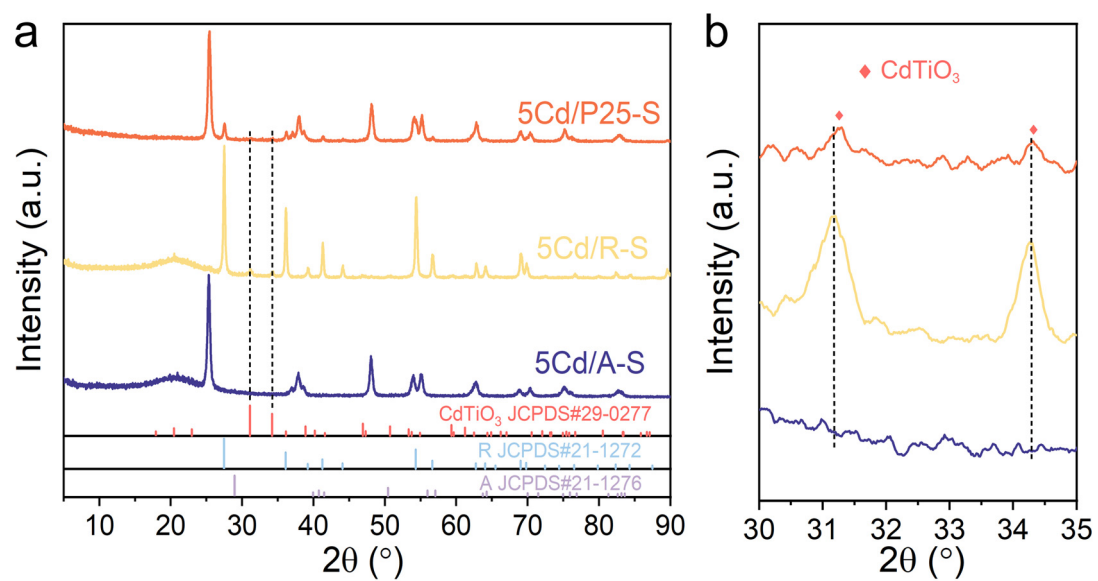

**Fig. S14** (a) XRD patterns of the spent catalysts. (S represents spent) (b) Enlarged view of the XRD patterns within the  $2\theta$  range of  $30^\circ$  to  $35^\circ$ .

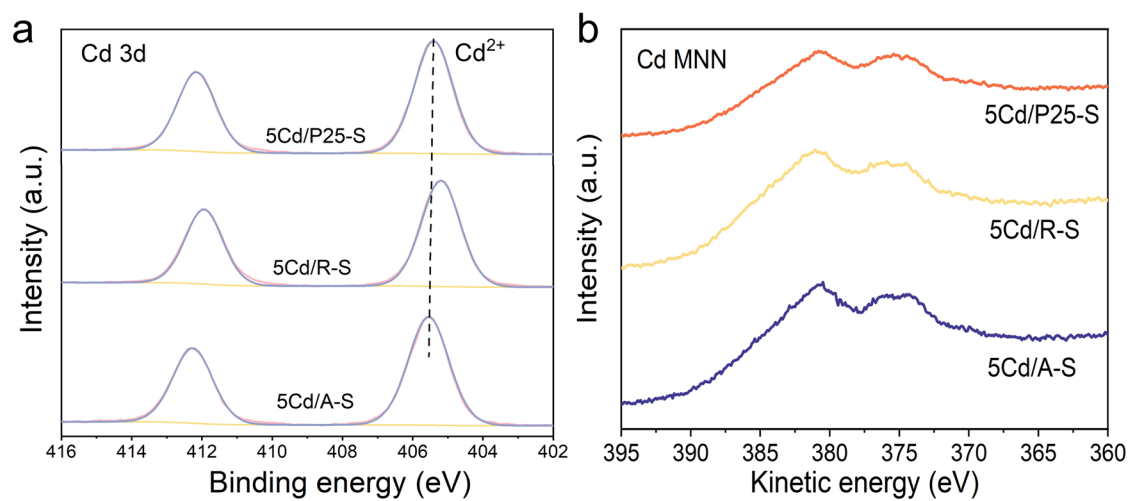

**Fig. S15** (a) XPS and (b) AES spectra of the spent catalysts.

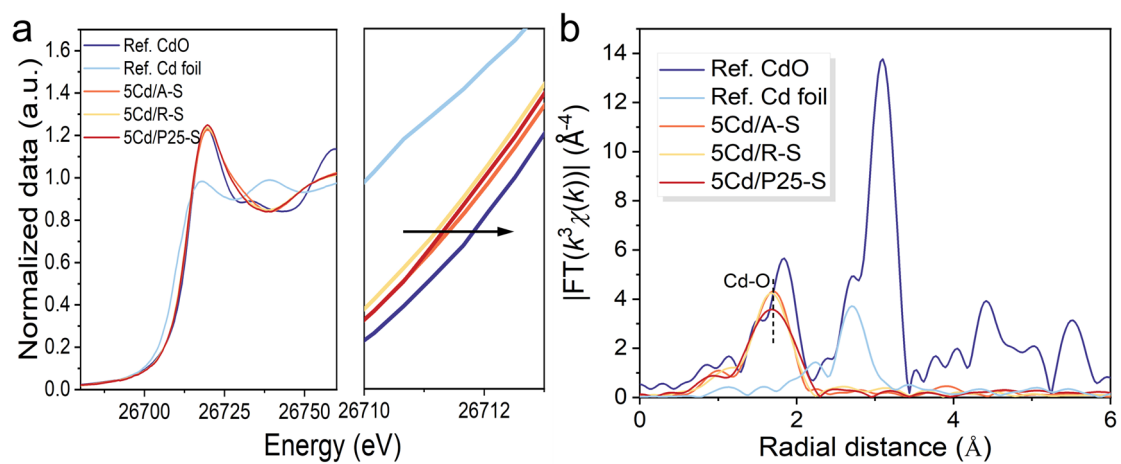

**Fig. S16** (a) Cd K-edge XANES spectra of the spent catalysts. (b)  $K^3$ -weighted  $\chi(k)$  function derived from the EXAFS spectra.

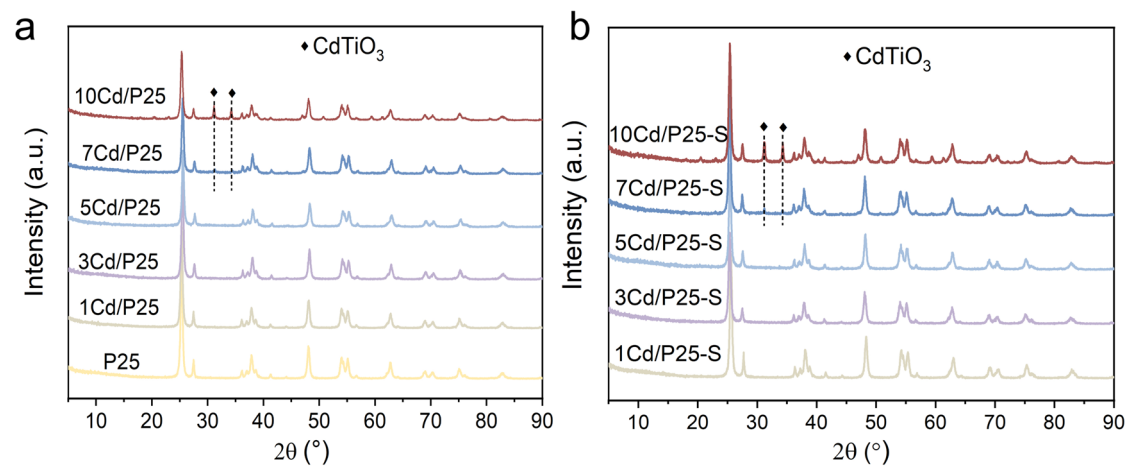

**Fig. S17** XRD patterns of catalysts with different Cd loadings. **(a)** Fresh catalysts. **(b)** Spent catalysts.

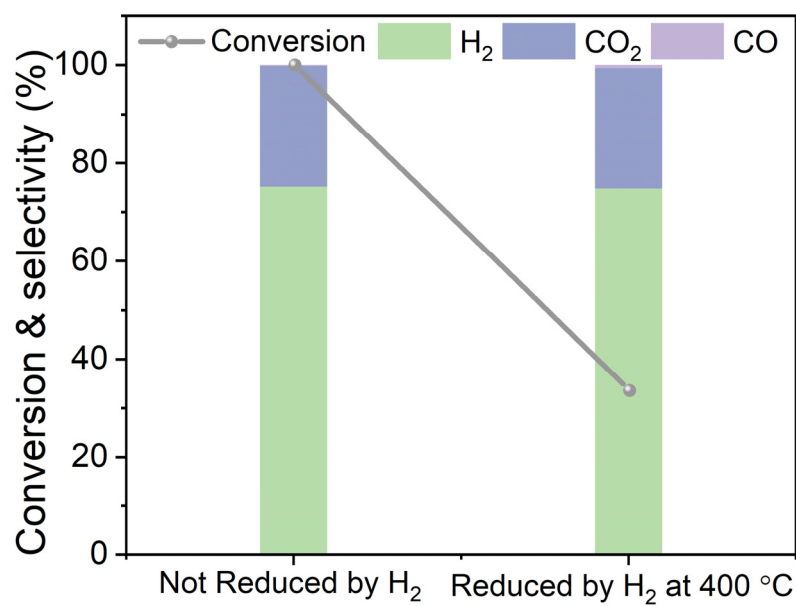

**Fig. S18** Influence of H<sub>2</sub> reduction temperature on the catalytic performance of the 5Cd/P25 catalyst. Reduction conditions: 400°C, H<sub>2</sub> (50mL/min), and atmospheric pressure.

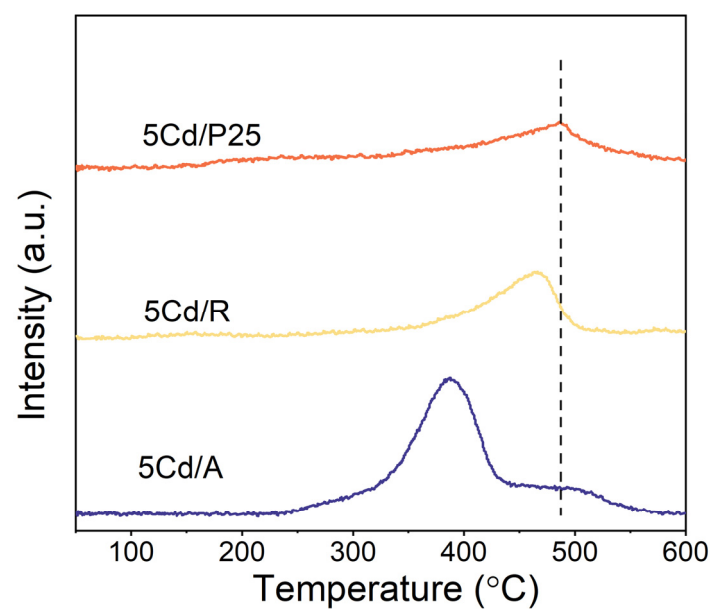

**Fig. S19** H<sub>2</sub>-TPR profiles of three fresh catalysts.



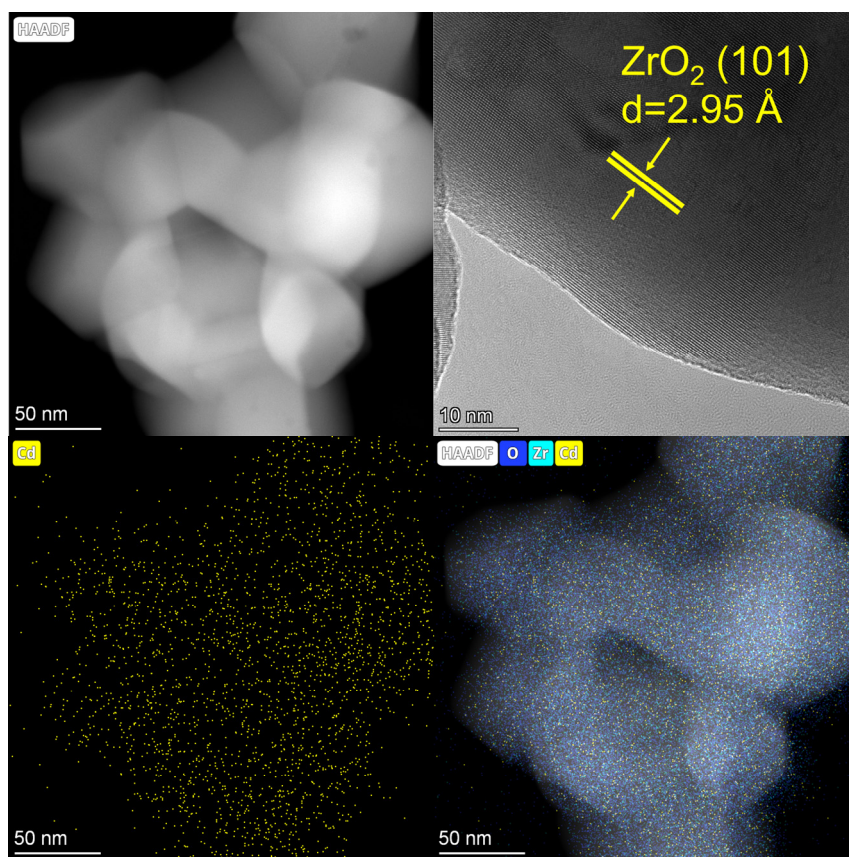

**Fig. S20** HAADF, HRTEM, and EDX mapping images of the 5Cd/ZrO<sub>2</sub> catalyst.

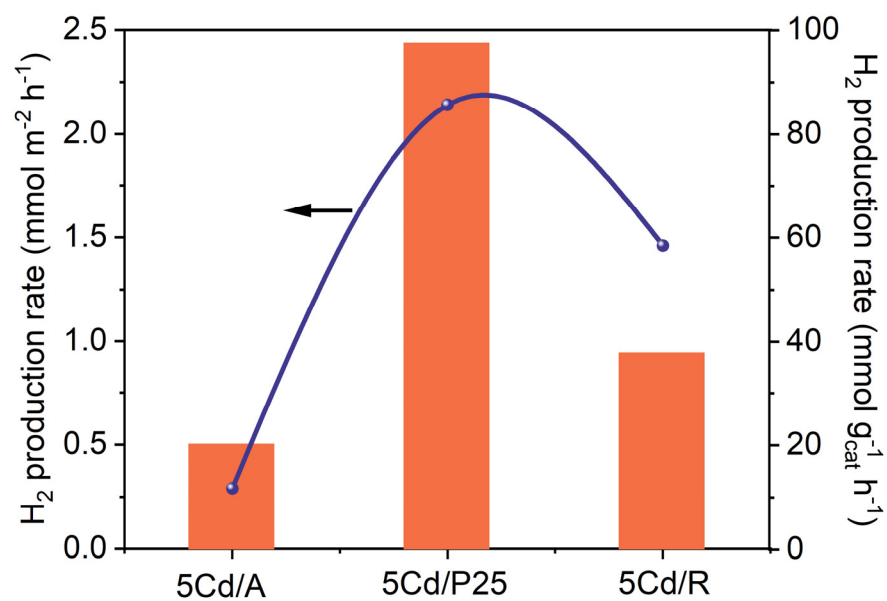

**Fig. S21** H<sub>2</sub> production rate normalized to the specific surface area of TiO<sub>2</sub> for a comparative analysis of different catalysts.

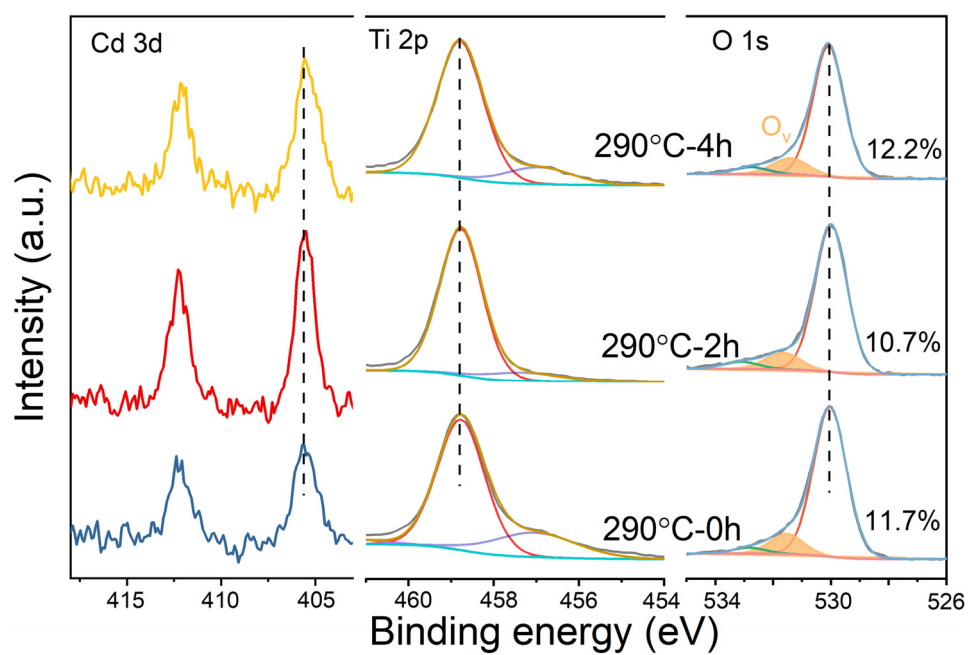

**Fig. S22** In situ XPS spectrum of the 5Cd/P25 catalyst during the MSR reaction at 290°C and a S/C ratio of 3/1.

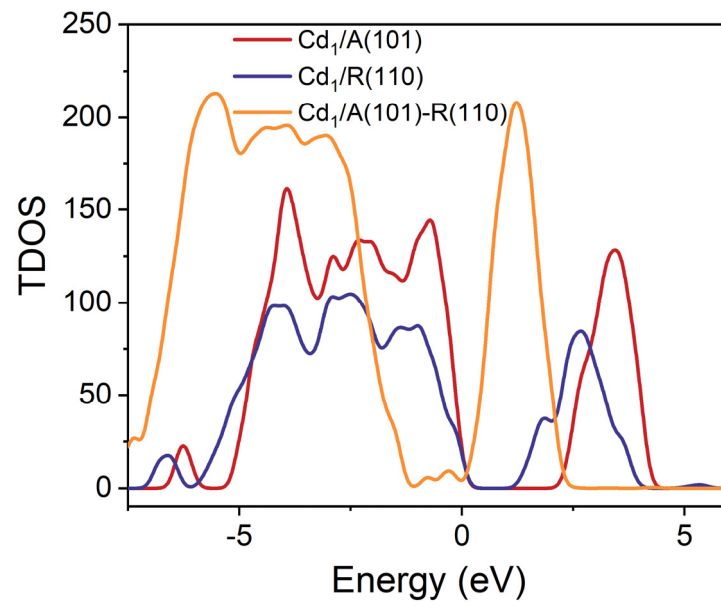

**Fig. S23** Total density of states for the  $\text{Cd}_1/\text{A}(101)$ ,  $\text{Cd}_1/\text{R}(110)$ , and  $\text{Cd}_1/\text{A}(101)\text{-R}(110)$ .

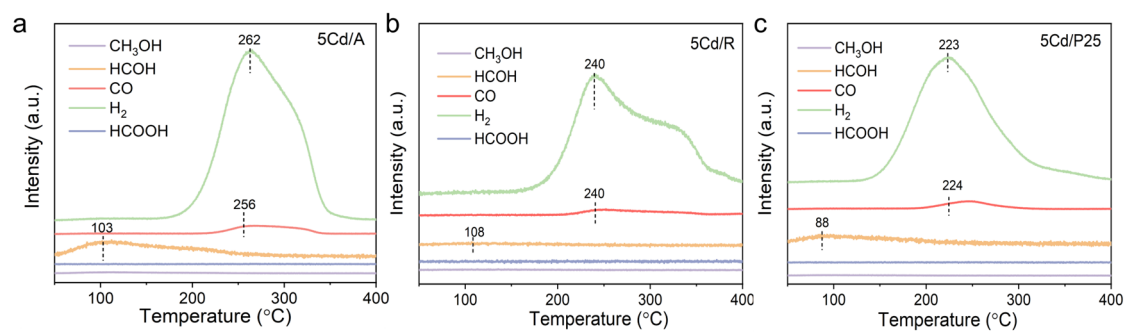

**Fig. S24**  $\text{CH}_3\text{OH}$ -TPD profiles of three samples ( $\text{CH}_3\text{OH}$  was decomposed with the increase of temperature).

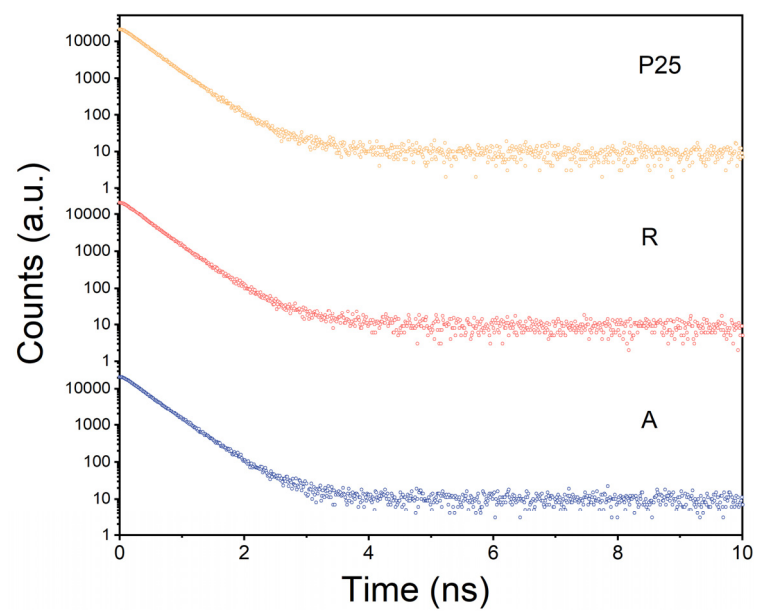

**Fig. S25** PALS of A, R, and P25 support materials.

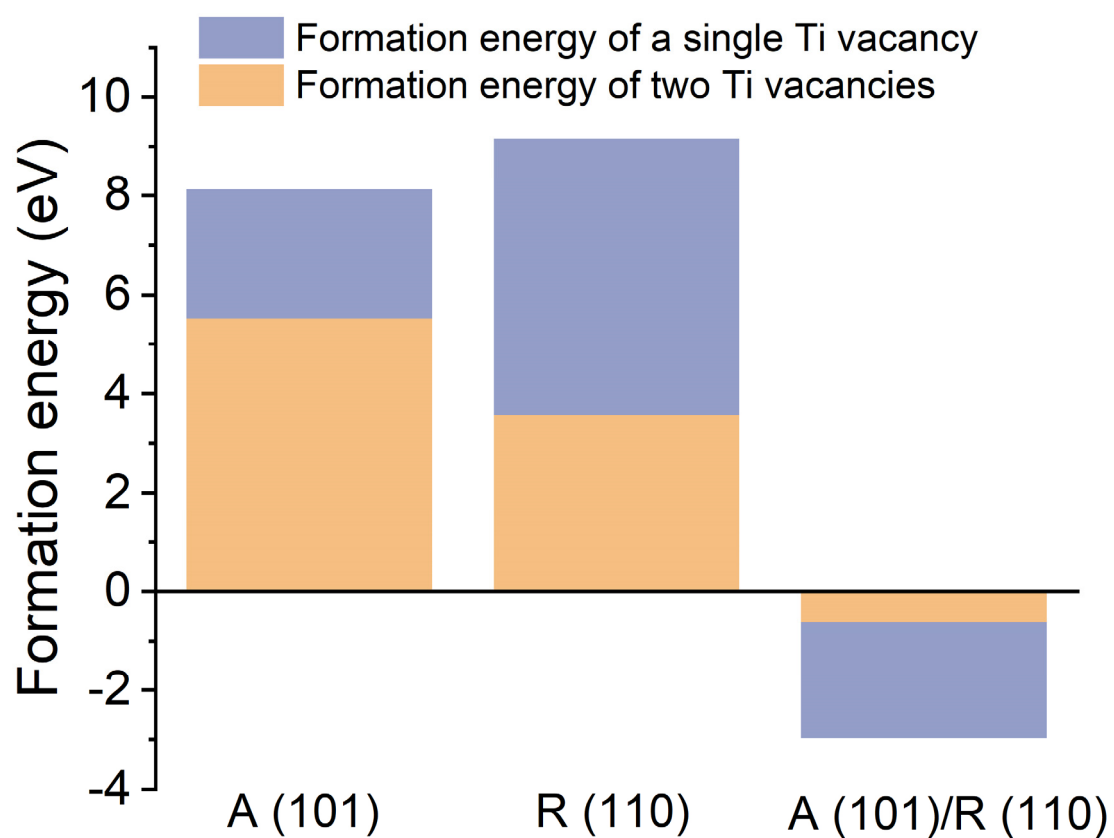

**Fig. S26** Ti vacancy formation energies of a single or two Ti vacancies for the A (101), R (110) facets, and the A (101)-R (110) phase junction.

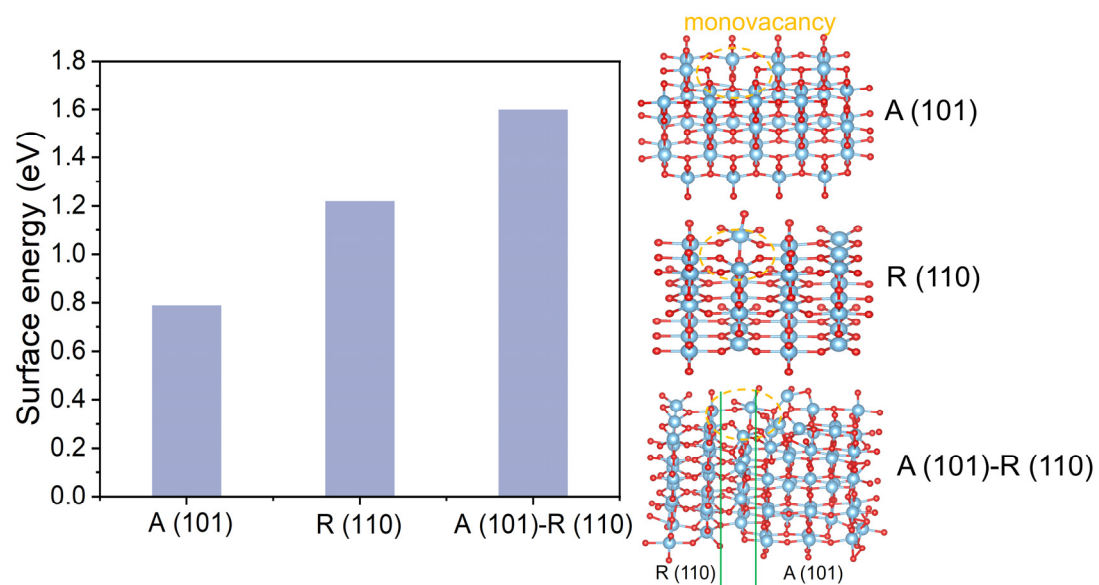

**Fig. S27** Surface energy and structure models of the A (101), R (110) facets, and the A (101)-R (110) phase junction with a monovacancy.



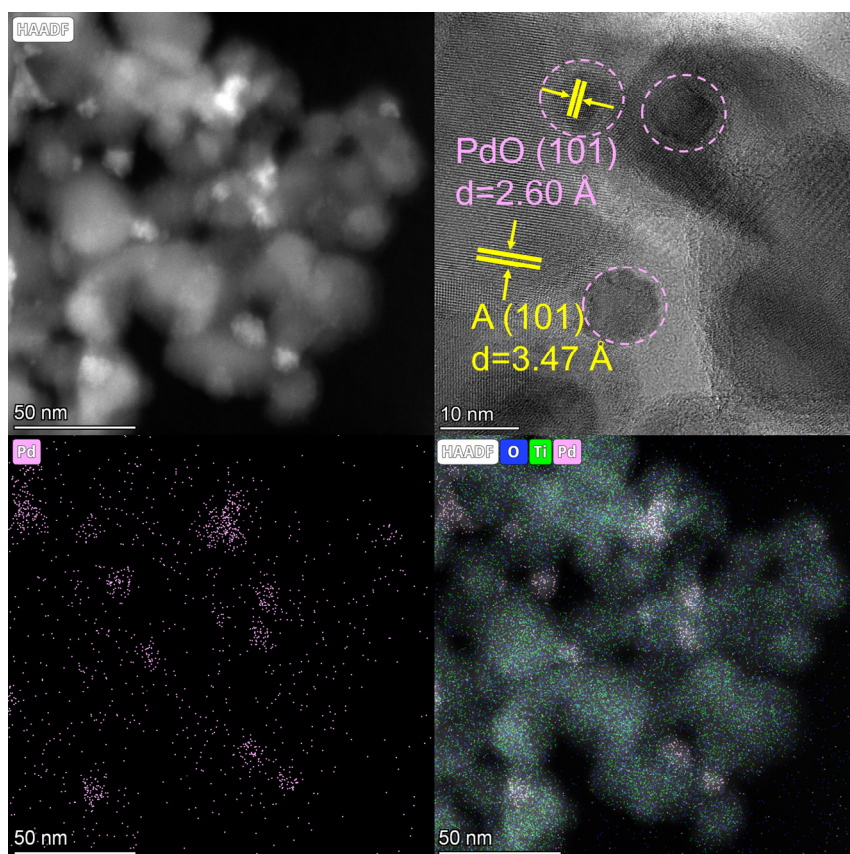

**Fig. S28** HAADF, HRTEM, and EDS mapping images of the 5Pd/P25 catalyst.

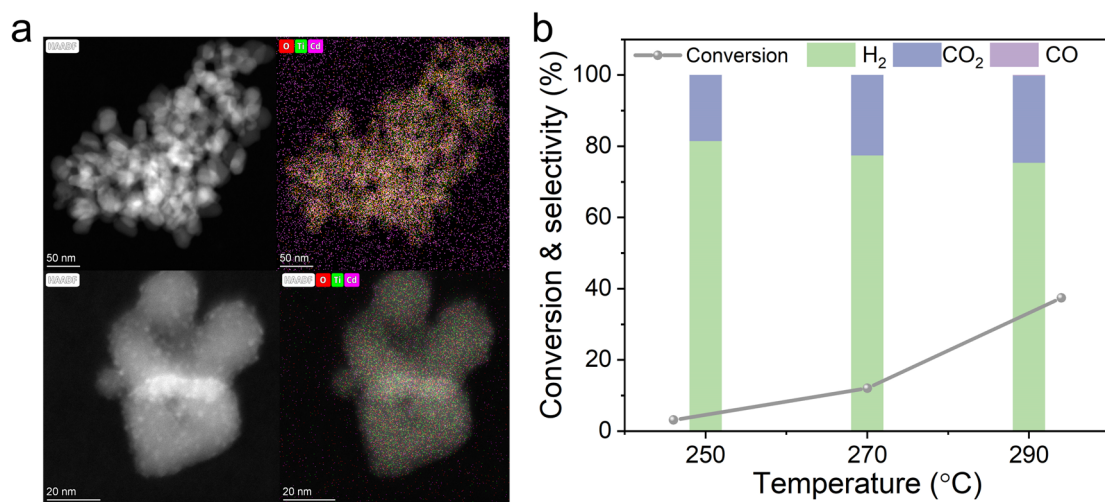

**Fig. S29** (a) HADDF and EDS mapping images of the 5Cd/80A-20R catalyst. (b) Corresponding methanol conversion and product selectivity under the following reaction conditions: temperatures ranging from 250 to 290°C, an S/C ratio of 3/1, 0.1 MPa pressure, and a feed rate of 3 mL g<sup>-1</sup> h<sup>-1</sup>.

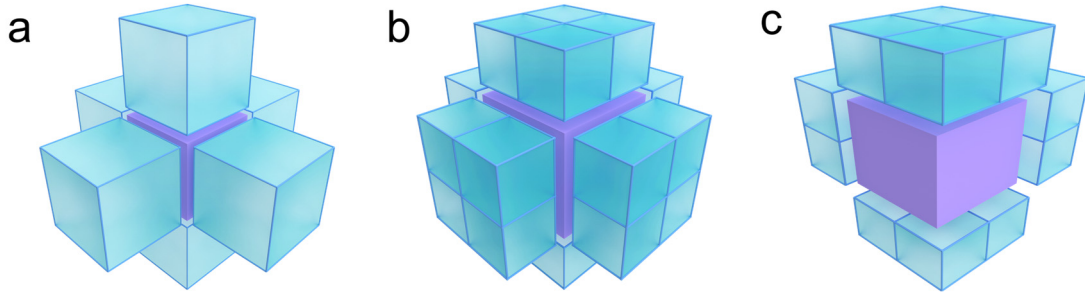

**Fig. S30** Schematic representations of three size models with anatase (A) stacked on rutile (R). **(a)** The two cubes are equal in size. **(b)** R is twice the size of A. **(c)** A is twice the size of R (blue cubes: A; purple cubes: R).

Based on TEM images revealing the irregular shape of catalyst particles, we approximated the catalysts as stacked cubes of anatase (A) and rutile (R). The particle size and phase ratio, which can be tuned via  $N_2$  and  $H_2$  pretreatments, influence the interface density between particles. Therefore, the theoretical interface density can be deduced from the contact area of these stacked cubes. The particle size and phase ratio were determined using the Scherrer equation, as detailed in Table S7. Given the larger particle size of R relative to A, the model further reduces to the scenario where A is stacked on R, with the maximum contact area constrained by the dimensions of R. If A and R are of equal size, the maximum contact number is 6 (Fig. S27A); If R is twice the size of A, this number doubles to 24 (Fig. S27B). Therefore, the maximum contact number ( $CN_{max}$ ) can be calculated as follows:

$$CN_{max} = \frac{S(R)}{S(A)} \times 6 = \frac{a^2(R)}{a^2(A)} \times 6$$

Where  $a$  is the cube size (crystal size); Since the size of the R does not exceed twice that of the A, the  $CN_{max}$  ranges from 6 to 24 (Fig. S27C).

The  $N$  is defined as the particle number of A or R, which was determined by the phase ratio.

$$N(A) = \frac{w_A}{\rho_A a(A)^3} \quad N(R) = \frac{w_R}{\rho_R a(R)^3}$$

Where  $w$  is the weight fraction,  $\rho$  is the respective crystal density ( $\rho_R$ : 4.2 g/cm<sup>3</sup>;  $\rho_A$ : 4.2 g/cm<sup>3</sup>), and  $a$  refers to the cube size (crystal size). The data is presented in Table S8.

Our model does not consider the specific dispersion of particles observed in practical scenarios, such as clusters of adjacent R particles. Therefore, as illustrated in Fig. S27, the theoretical maximum interface density ( $A_{max}$ ) is derived from the subsequent equation under conditions where the ratio  $N(A)/N(R)$  is greater than  $CN_{max}$  (where the quantity of A significantly outnumbers rutile R, yet not every A cube contacts with R).

$$A_{max} = 6 \times N(R) \times a(R)^2$$

Catalysts pretreated with N<sub>2</sub> at 500 °C for 2 hours align with the aforementioned equation.

When the ratio of N(A)/N(R) is less than CN<sub>max</sub>, full contact between A and R is possible. The A<sub>max</sub> can then be calculated using the following formula:

$$A_{max} = \frac{N(A)/N(R)}{CN_{max}} \times 6 \times N(R) \times a(R)^2$$

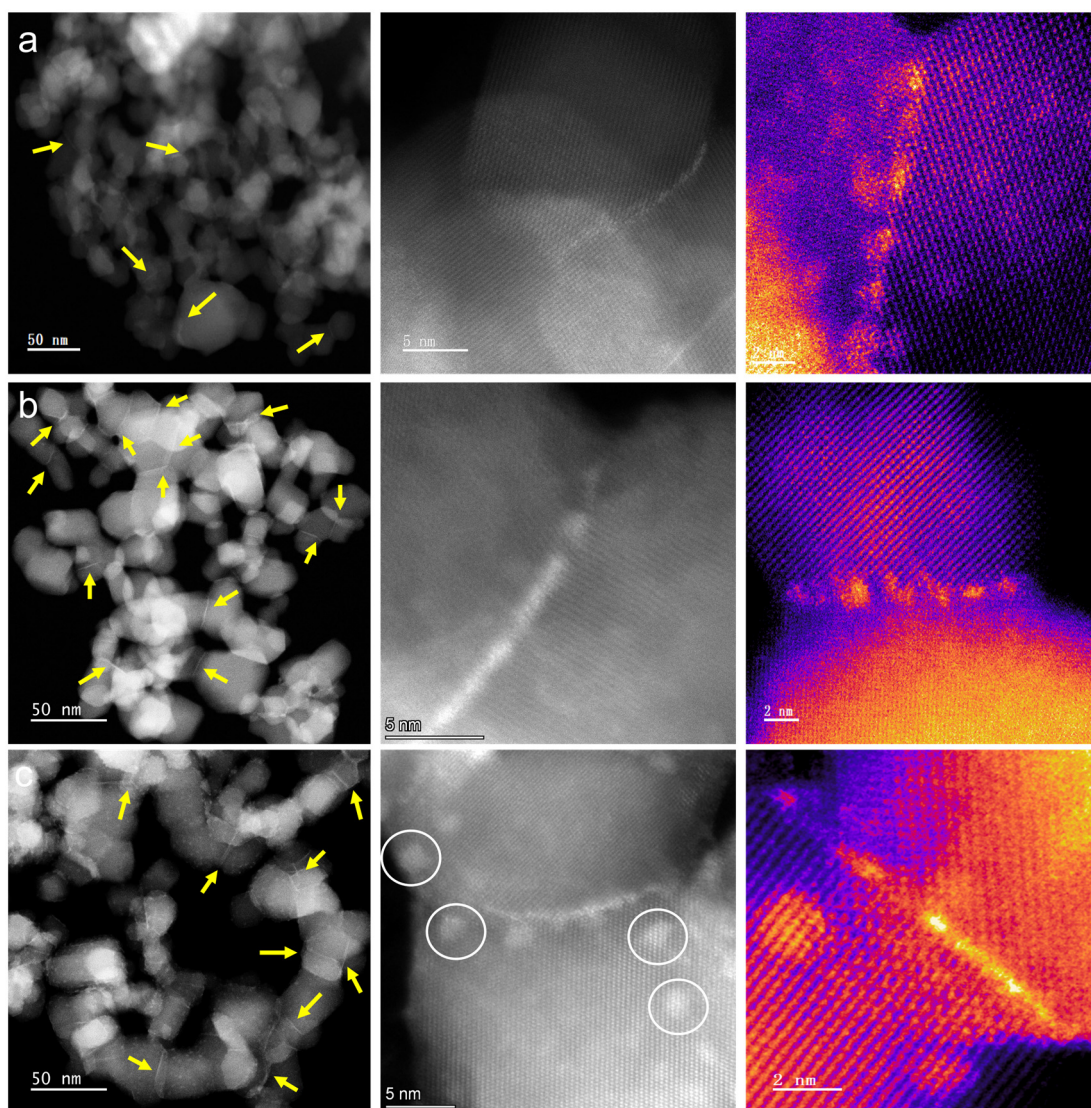

**Fig. S31** HADDF-STEM images of the 5Cd/P25 catalyst following H<sub>2</sub> pretreatment for (a) 0 h, (b) 4 h, and (c) 8 h.

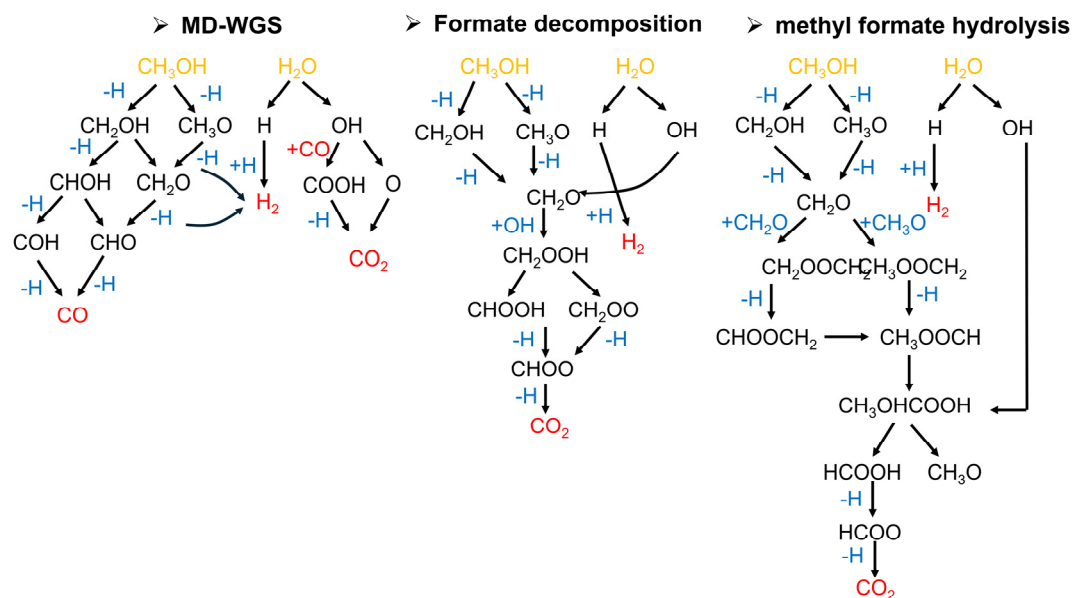

**Fig. S32** Schematic representation of the three MSR reaction pathways.



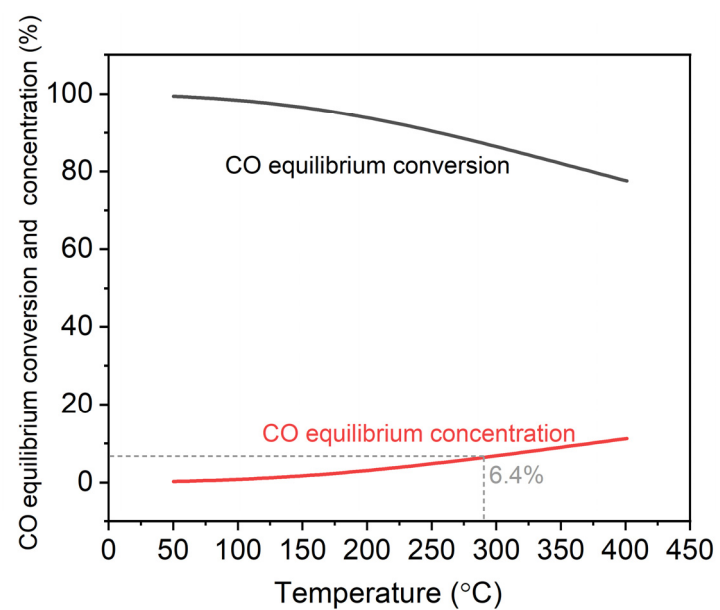

**Fig. S33** Equilibrium conversion and concentration profiles for CO in the water-gas shift (WGS) reaction.

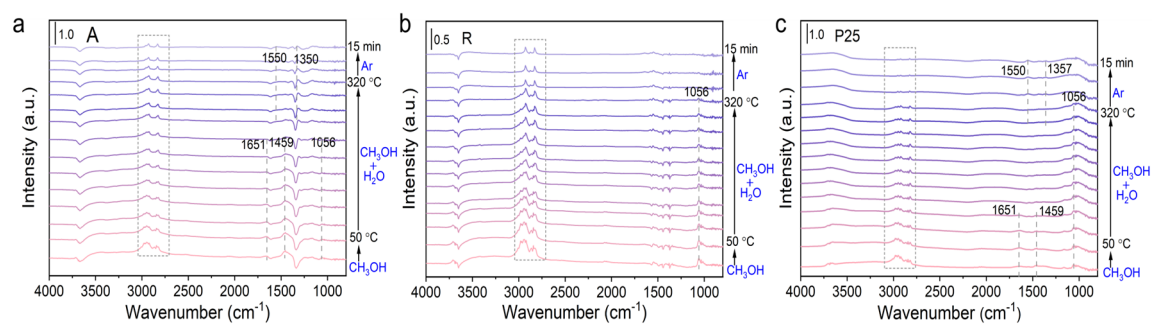

**Fig. S34** In situ DRIFTS of A, R, and P25 supports during the MSR reaction.



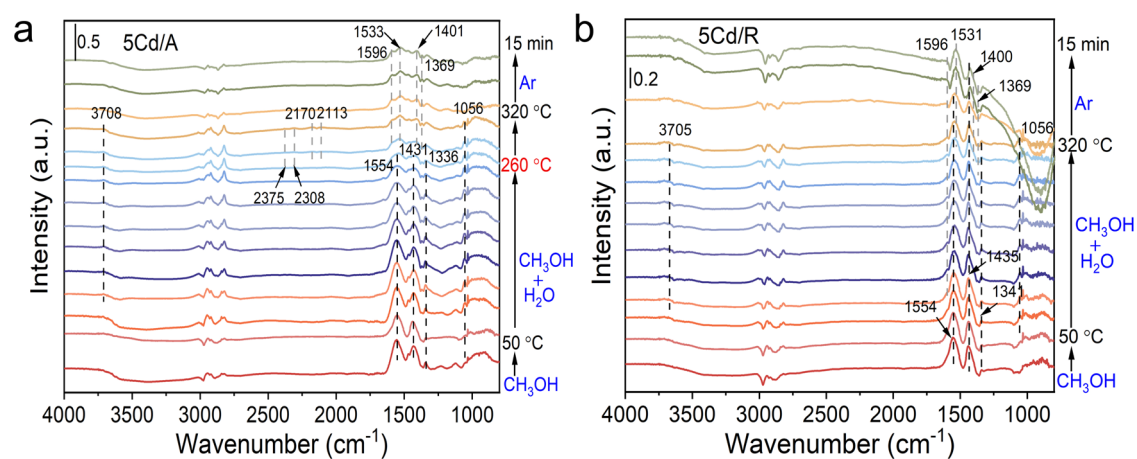

**Fig. S35** In situ DRIFTS of the 5Cd/A and 5Cd/R catalysts during the MSR reaction.

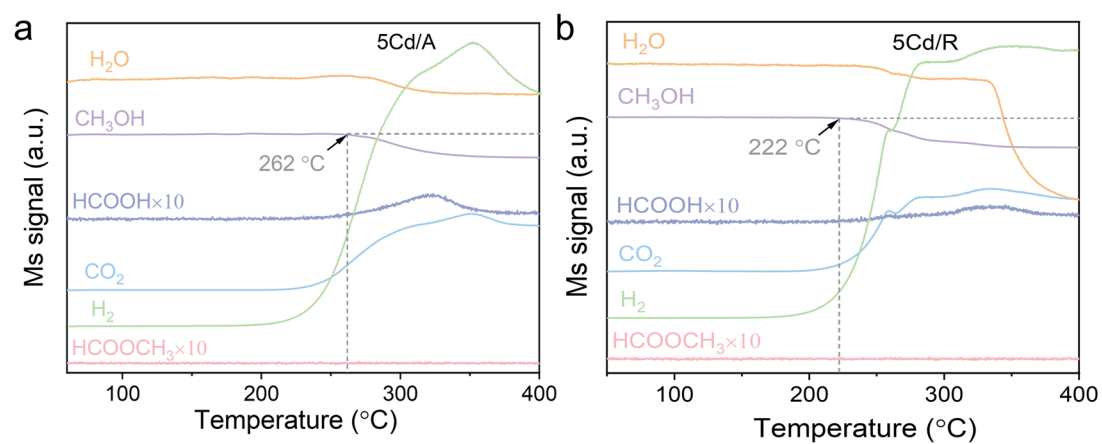

**Fig. S36** TPSR profiles of the 5Cd/A (a) and 5Cd/R (b) catalysts.

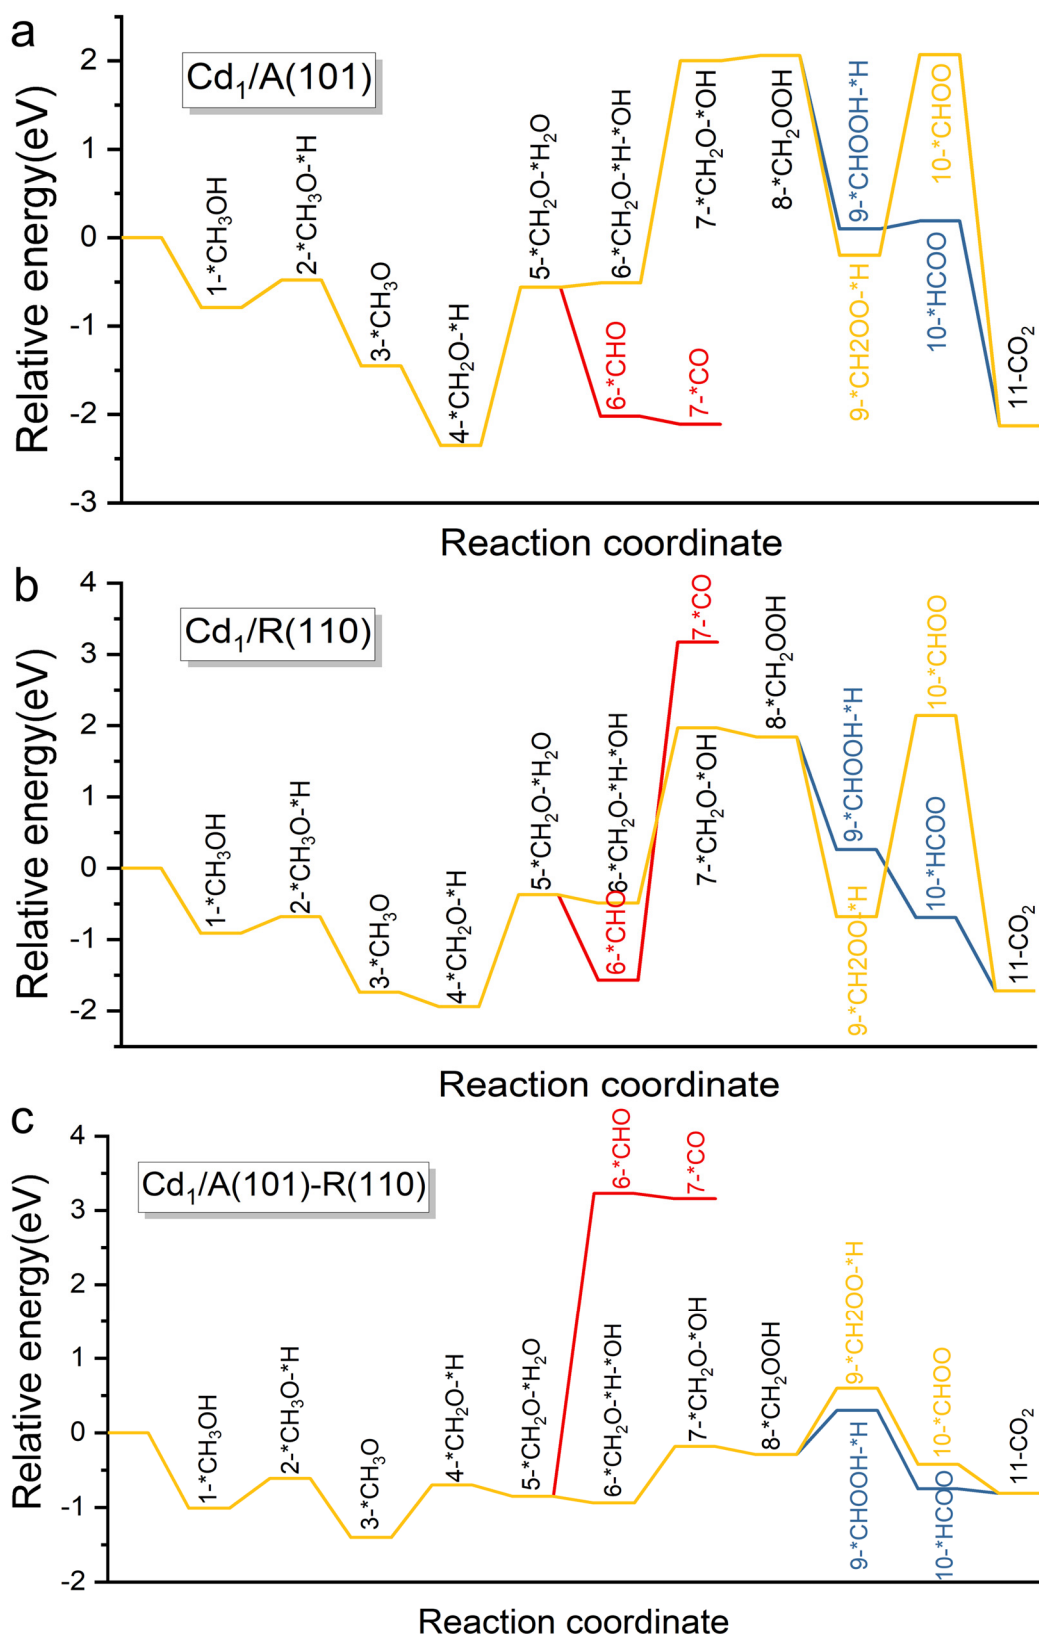

**Fig. S37** Energy landscapes for the single-atom catalyst configurations: (a)  $\text{Cd}_1/\text{A}(101)$ , (b)  $\text{Cd}_1/\text{R}(110)$ , and (c)  $\text{Cd}_1/\text{A}(101)\text{-R}(110)$ .

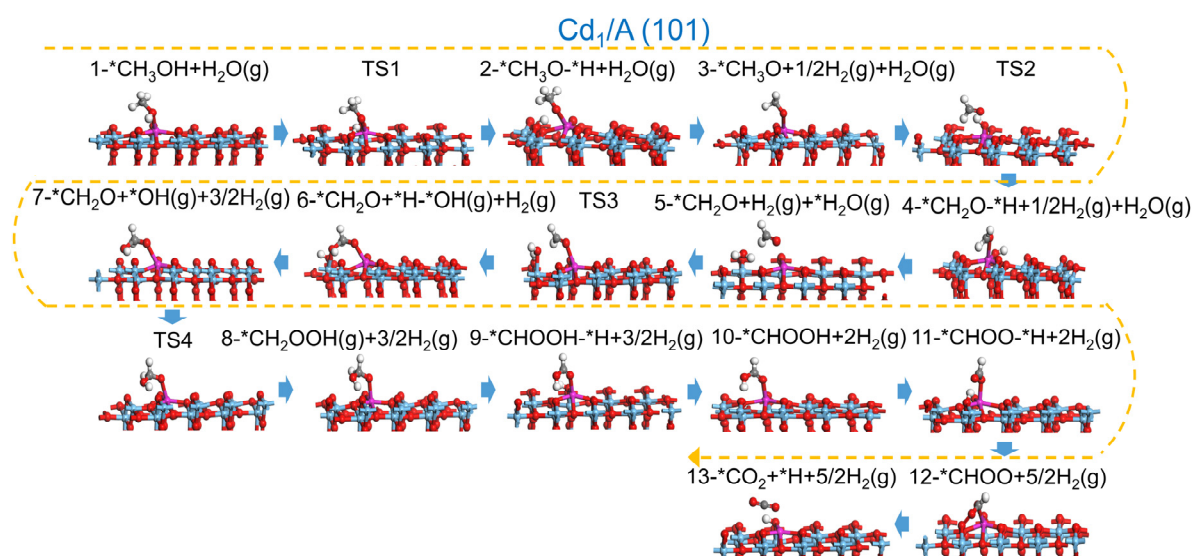

**Fig. 38** Atomic models illustrating the formate decomposition pathway on  $\text{Cd}_1/\text{A} (101)$  during the MSR reaction.

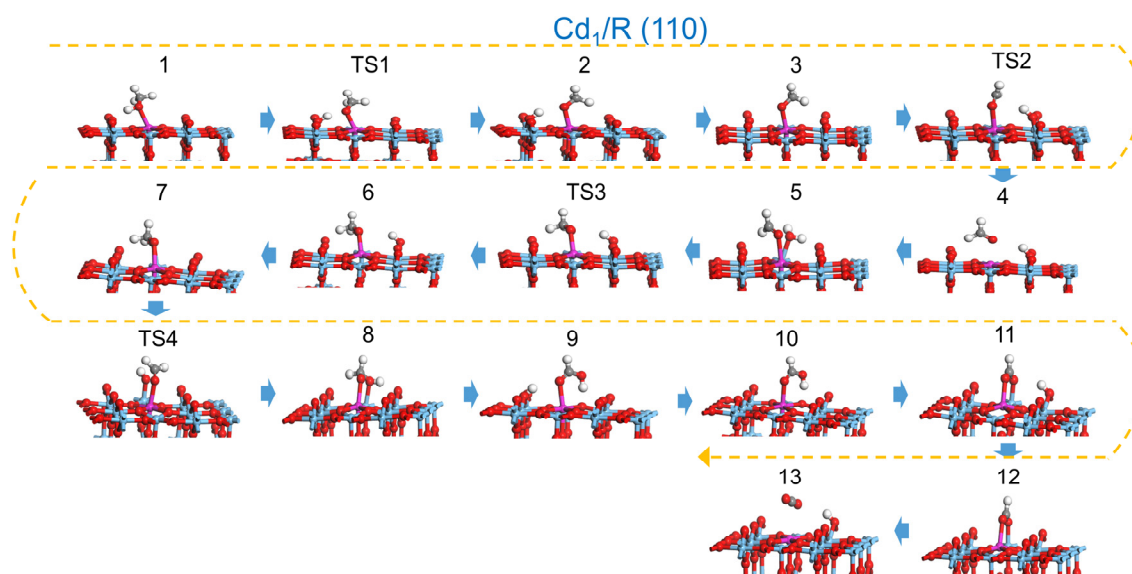

**Fig. 39** Atomic models illustrating the formate decomposition pathway on  $\text{Cd}_1/\text{R} (110)$  during the MSR reaction.

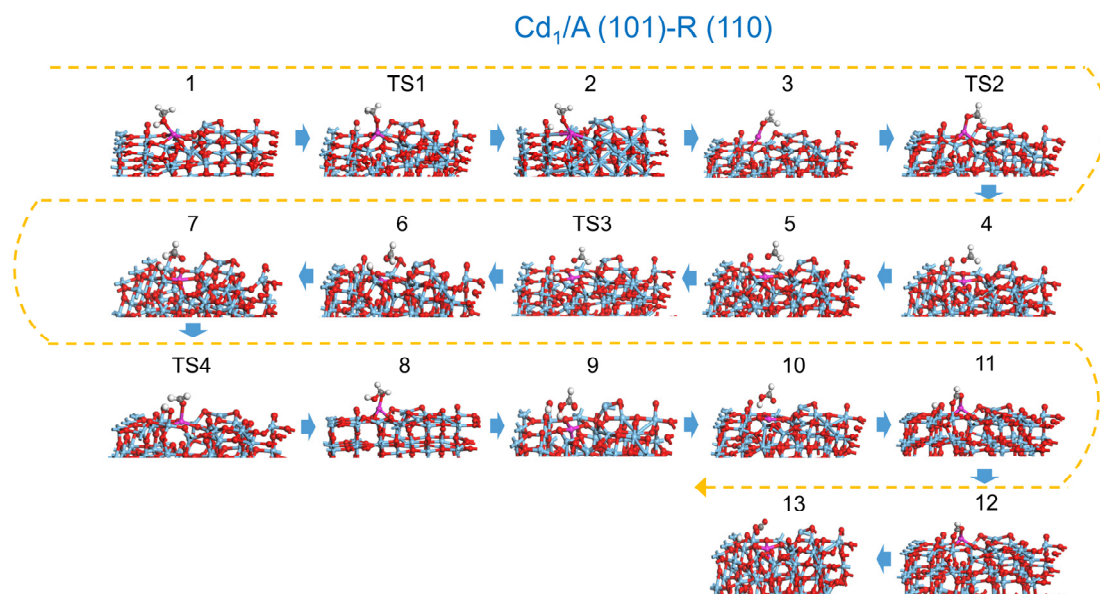

**Fig. 40** Atomic models illustrating the formate decomposition pathway on  $\text{Cd}_1/\text{A} (101)\text{-R} (110)$  during the MSR reaction.

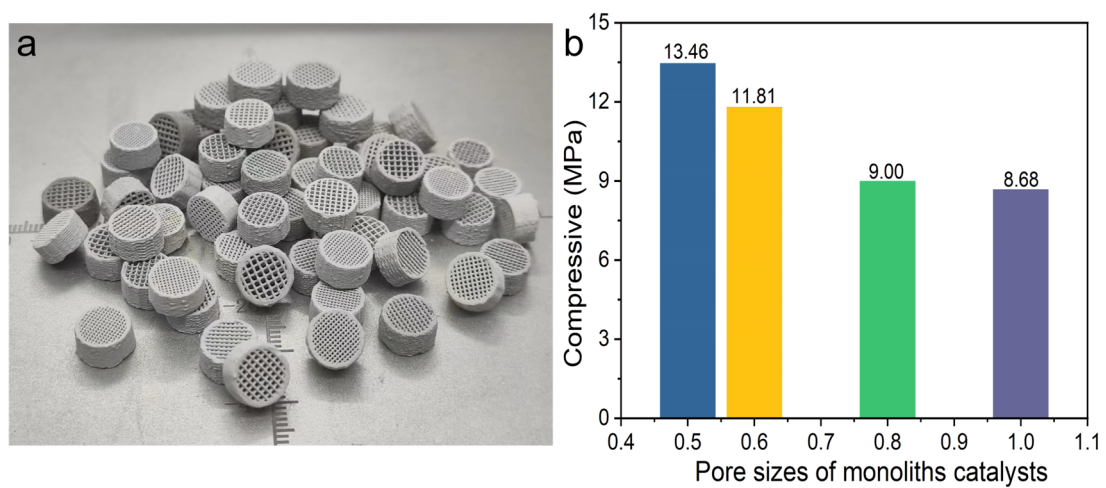

**Fig. S41** (a) 3D printed kilogram-scale 5Cd/P25 catalysts. (b) Compressive strength of 3D-printed monolithic catalysts with varying pore sizes.

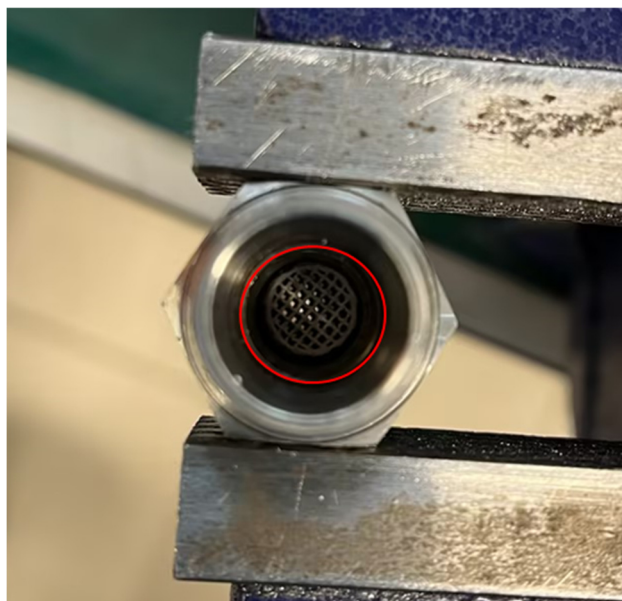

**Fig. S42** Custom-sizing of 3D-printed catalysts to fit specific reactor dimensions.



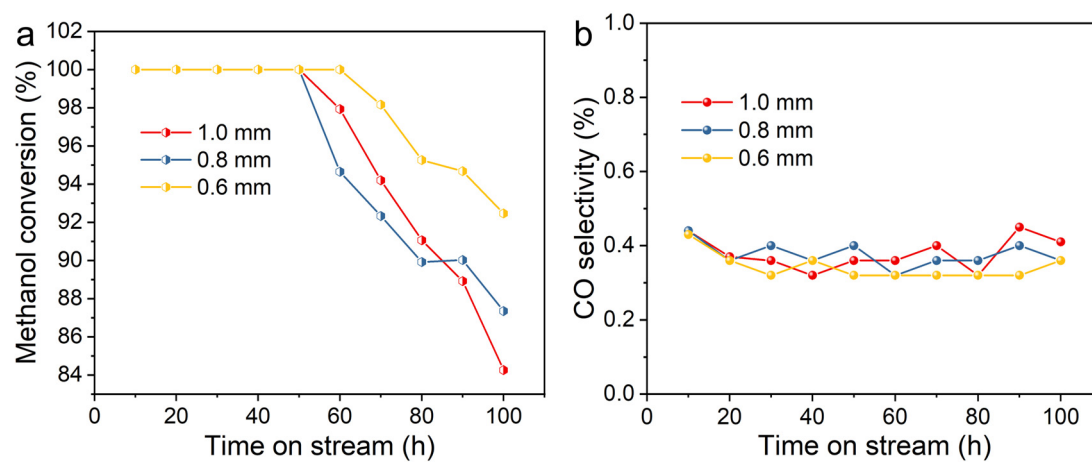

**Fig. S43** Methanol conversion (**a**) and CO selectivity (**b**) of 3D-printed 5Cd/P25 catalysts with different pore sizes.

Note: The larger pore size in 3D printing affected its stability, which is likely due to structural collapse.

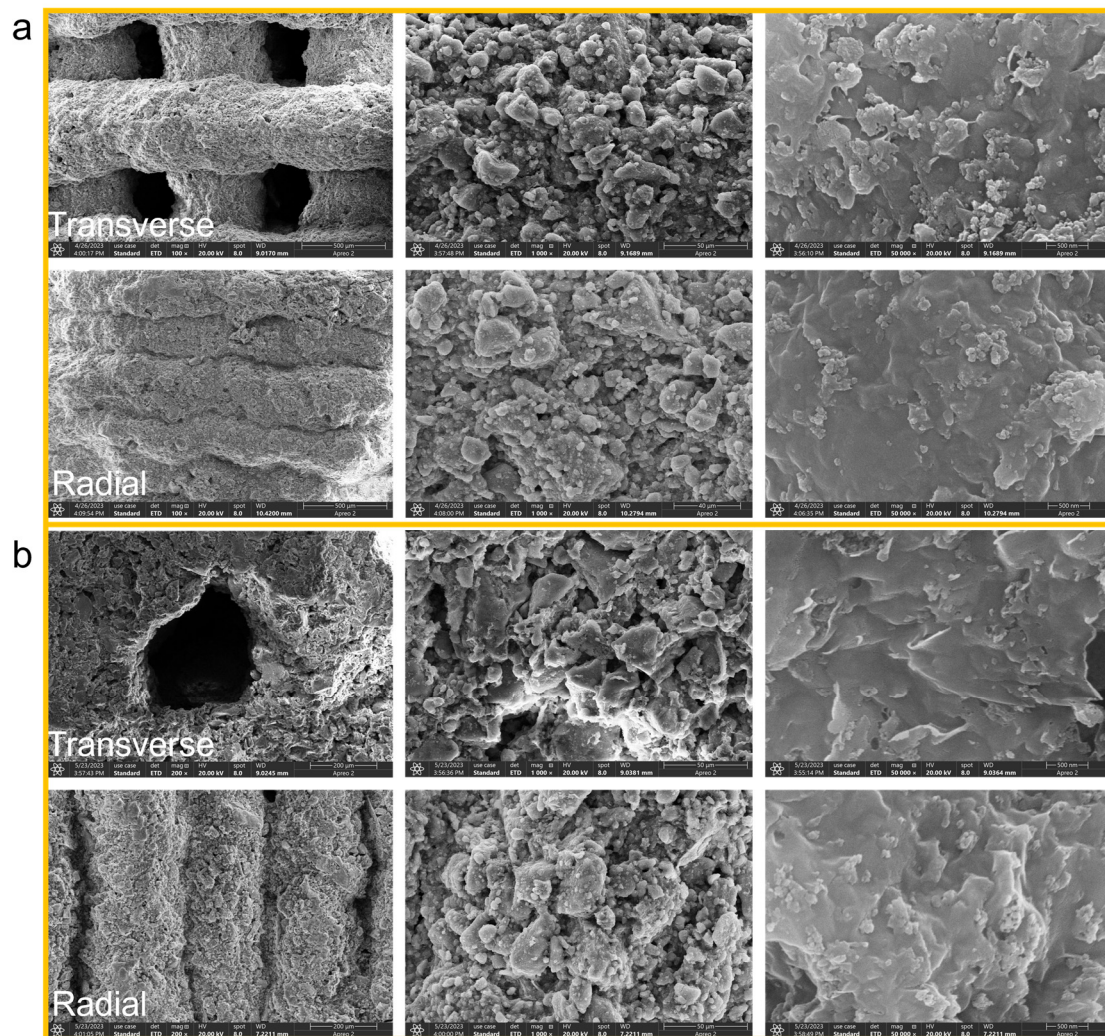

**Fig. S44** SEM images of the 3D-printed 5Cd/P25 catalysts with a pore size of 0.5 mm, showing (a) fresh and (b) spent catalysts.

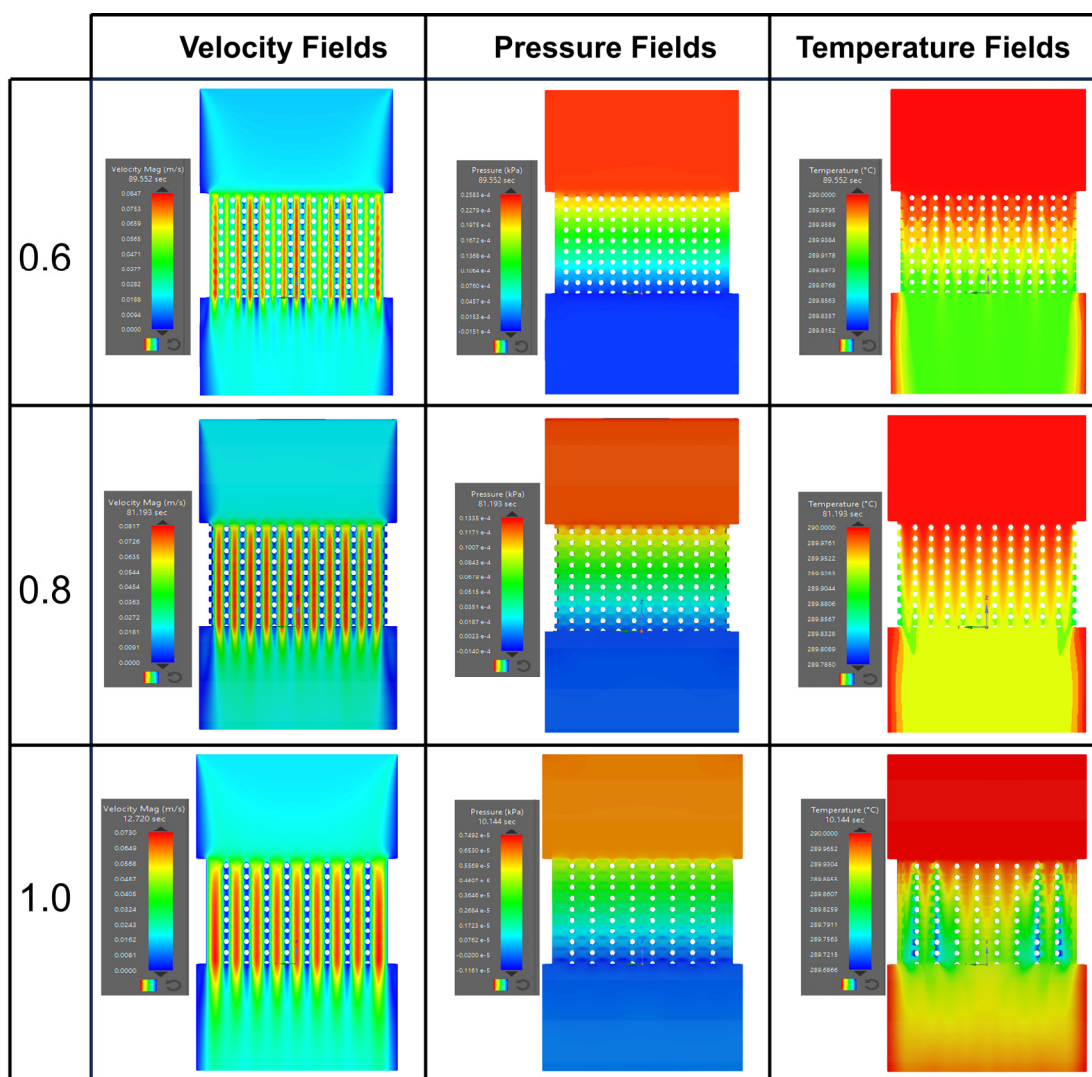

**Fig. S45** CFD simulation of mass and heat transfer in monolithic catalysts. Simulated velocity, pressure, and temperature fields for 3D-printed Cd/TiO<sub>2</sub> catalysts with pore sizes of 0.6 mm, 0.8 mm, and 1.0 mm, respectively.

**Table S1** Lattice mismatch between cadmium oxides and anatase/rutile.

|         | Lattice constant (a) | Lattice mismatch ( $\Delta\delta$ )* |
|---------|----------------------|--------------------------------------|
| Anatase | 3.7842               | 24.1%                                |
| Rutile  | 4.5845               | 2.4%                                 |
| CdO     | 4.69599              | -                                    |

\*The lattice mismatch was calculated by the formulate:

$$\Delta\delta = \frac{a_{Cd} - a_{TiO_2}}{a_{TiO_2}}$$

**Table S2** EXAFS fitting parameters at the Cd *K*-edge for various samples ( $S_0^2=0.769$ ).

| Samples | Shell | $CN^a$   | $R(\text{\AA})^b$ | $\sigma^2(\text{\AA}^2)^c$ | $\Delta E_0(\text{eV})^d$ | <i>R</i> factor |
|---------|-------|----------|-------------------|----------------------------|---------------------------|-----------------|
| Cd foil | Cd-Cd | 6*       | 2.939±0.006       | 0.0124±0.0008              | 3.0±0.8                   | 0.0081          |
| CdO     | Cd-O  | 6.0±0.4  | 2.322±0.016       | 0.0082±0.0013              | 1.9±2.2                   | 0.0184          |
|         | Cd-Cd | 12.0±0.5 | 3.322±0.004       | 0.0080±0.0005              |                           |                 |
| 5Cd/A   | Cd-O  | 6.2±0.2  | 2.245±0.004       | 0.0099±0.0007              | 1.4±0.3                   | 0.0016          |
| 5Cd/R   | Cd-O  | 5.4±0.5  | 2.237±0.012       | 0.0090±0.0020              | 0.9±0.9                   | 0.0108          |
| 5Cd/P25 | Cd-O  | 5.8±0.5  | 2.236±0.010       | 0.0098±0.0018              | 0.6±0.8                   | 0.0057          |

<sup>a</sup>*CN*: Coordination number; <sup>b</sup>*R*: Distance to the neighboring atom; <sup>c</sup> $\sigma^2$ : Mean square relative displacement (MSRD); <sup>d</sup> $\Delta E_0$ : Inner potential correction; *R* factor indicates the goodness of the fit.  $S_0^2$  was fixed to 0.769, according to the experimental EXAFS fit of Cd foil by fixing *CN* as the known crystallographic value. \* This value was fixed during EXAFS fitting, based on the known structure of Cd.

Fitting range:

For Cd foil:  $3.0 \leq k (\text{\AA}) \leq 12.3$  and  $1.0 \leq R (\text{\AA}) \leq 3.5$ ;

For 5Cd/A:  $2.0 \leq k (\text{\AA}) \leq 11.3$  and  $1.0 \leq R (\text{\AA}) \leq 2.5$ ;

For 5Cd/R:  $2.0 \leq k (\text{\AA}) \leq 10.6$  and  $1.0 \leq R (\text{\AA}) \leq 2.5$ ;

For 5Cd/P25:  $2.0 \leq k (\text{\AA}) \leq 10.0$  and  $1.0 \leq R (\text{\AA}) \leq 2.5$ .

A reasonable range of EXAFS fitting parameters:  $0.700 < S_0^2 < 1.000$ ;  $CN > 0$ ;  $\sigma^2 > 0 \text{ \AA}^2$ ;  $|\Delta E_0| < 10 \text{ eV}$ ; *R* factor  $< 0.02$ .

**Table S3** EXAFS fitting parameters at the Cd *K*-edge for the spent catalysts ( $S_0^2=0.775$ ).

| Samples   | Shell | CN <sup>a</sup> | R(Å) <sup>b</sup> | $\sigma^2(\text{\AA}^2)^c$ | $\Delta E_0(\text{eV})^d$ | R factor |
|-----------|-------|-----------------|-------------------|----------------------------|---------------------------|----------|
| Cd foil   | Cd-Cd | 6*              | 2.940±0.011       | 0.0115±0.0009              | -0.5±2.7                  | 0.0067   |
| CdO       | Cd-O  | 6.0±0.4         | 2.322±0.016       | 0.0082±0.0013              | 1.9±2.2                   | 0.0184   |
|           | Cd-Cd | 12.0±0.5        | 3.322±0.004       | 0.0080±0.0005              |                           |          |
| 5Cd/A-S   | Cd-O  | 6.3±0.7         | 2.250±0.011       | 0.0095±0.0017              | 1.0±1.1                   | 0.0041   |
| 5Cd/R-S   | Cd-O  | 6.2±0.6         | 2.251±0.009       | 0.0103±0.0014              | 1.4±1.0                   | 0.0083   |
| 5Cd/P25-S | Cd-O  | 5.9±0.2         | 2.256±0.021       | 0.0111±0.0037              | 1.5±1.9                   | 0.0074   |

<sup>a</sup>CN: Coordination number; <sup>b</sup>R: Distance to the neighboring atom; <sup>c</sup> $\sigma^2$ : Mean square relative displacement (MSRD); <sup>d</sup> $\Delta E_0$ : Inner potential correction; R factor indicates the goodness of the fit.  $S_0^2$  was fixed to 0.775, according to the experimental EXAFS fit of Cd foil by fixing CN as the known crystallographic value. \* This value was fixed during EXAFS fitting, based on the known structure of Cd.

Fitting range:

For Cd foil:  $3.0 \leq k (\text{\AA}^{-1}) \leq 13.6$  and  $1.8 \leq R (\text{\AA}) \leq 3.5$ ;

For 5Cd/A-S:  $2.0 \leq k (\text{\AA}^{-1}) \leq 11.5$  and  $1.2 \leq R (\text{\AA}) \leq 2.5$ ;

For 5Cd/R-S:  $1.0 \leq k (\text{\AA}^{-1}) \leq 11.0$  and  $1.1 \leq R (\text{\AA}) \leq 2.5$ ;

For 5Cd/P25-S:  $2.5 \leq k (\text{\AA}^{-1}) \leq 9.6$  and  $1.2 \leq R (\text{\AA}) \leq 2.5$ .

A reasonable range of EXAFS fitting parameters:  $0.700 < S_0^2 < 1.000$ ;  $CN > 0$ ;  $\sigma^2 > 0 \text{ \AA}^2$ ;  $|\Delta E_0| < 10 \text{ eV}$ ; R factor  $< 0.02$ .

**Table S4** Catalytic performance of homemade reference catalysts.

| Catalyst           | Conversion (%) | S <sub>CO2</sub> | S <sub>CO</sub> | S <sub>CH4</sub> |
|--------------------|----------------|------------------|-----------------|------------------|
| CdTiO <sub>3</sub> | 0              | 0                | 0               | 0                |
| CdO                | 0.1            | 0                | 100             | 0                |
| Cd                 | 0              | 0                | 0               | 0                |

Reaction conditions: 290°C, 0.1 MPa, a S/C ratio of 3/1, and a feed rate of 3 mL g<sup>-1</sup> h<sup>-1</sup>

**Table S5** Texture properties of fresh catalysts.

| <b>Catalysts</b> | <b>BET surface area<br/>(m<sup>2</sup>/g)</b> | <b>Pore volume<br/>(cm<sup>3</sup>/g)</b> | <b>Average pore<br/>diameter (nm)</b> |
|------------------|-----------------------------------------------|-------------------------------------------|---------------------------------------|
| A                | 85.54                                         | 0.35                                      | 16.51                                 |
| R                | 36.10                                         | 0.19                                      | 21.22                                 |
| P25              | 51.82                                         | 0.31                                      | 23.29                                 |
| 5Cd/A            | 70.91                                         | 0.24                                      | 13.21                                 |
| 5Cd/R            | 26.00                                         | 0.09                                      | 14.29                                 |
| 5Cd/P25          | 45.60                                         | 0.36                                      | 31.65                                 |



**Table S6** Positron lifetimes and relative intensities of samples.

| <b>Catalyst</b> | $\tau_1(\text{ps})$ | $I_1(\%)$ | $\tau_2(\text{ps})$ | $I_2(\%)$ |
|-----------------|---------------------|-----------|---------------------|-----------|
| A               | 245                 | 16.0      | 374                 | 84.0      |
| R               | 217                 | 26.4      | 386                 | 73.6      |
| P25             | 212                 | 7.3       | 364                 | 92.7      |

**Table S7** Ionic radius and electronegativities of the metals.

| Metals | Ionic radius (Å)            | Electronegativity |
|--------|-----------------------------|-------------------|
| Cd     | 0.97 (2+, six coordination) | 1.69              |
| Pd     | 0.86 (2+, six coordination) | 2.20              |
| Pt     | 0.62 (4+, six coordination) | 2.28              |
| Cu     | 0.73 (2+, six coordination) | 1.90              |
| Ti     | 0.61 (4+, six coordination) | 1.54              |

**Table S8** Data for interface density calculations following the N<sub>2</sub> and H<sub>2</sub> pretreatments of P25.

| Pre-treatment  | Temperature /Time | W <sub>A</sub> /% | W <sub>R</sub> /% | crystal size /nm | CN <sub>max</sub> | N (A) /10 <sup>15</sup> g <sup>-1</sup> | N (R) /10 <sup>15</sup> g <sup>-1</sup> | N (A) / N (R) | A <sub>max</sub> /m <sup>2</sup> g <sup>-1</sup> |      |
|----------------|-------------------|-------------------|-------------------|------------------|-------------------|-----------------------------------------|-----------------------------------------|---------------|--------------------------------------------------|------|
|                |                   |                   |                   | A                | R                 |                                         |                                         |               |                                                  |      |
| N <sub>2</sub> | 500°C/2h          | 79.6              | 20.4              | 19.2             | 36.7              | 21.9                                    | 29.6                                    | 0.9           | 30.1                                             | 7.9  |
|                | 600°C/2h          | 69.9              | 30.1              | 21.7             | 36.9              | 17.3                                    | 18.0                                    | 1.4           | 12.6                                             | 8.5  |
|                | 700°C/2h          | 29.6              | 70.4              | 33.0             | 48.4              | 12.9                                    | 2.2                                     | 1.5           | 1.5                                              | 2.4  |
| H <sub>2</sub> | 500°C/2h          | 73.6              | 26.4              | 19.6             | 21.6              | 7.3                                     | 25.7                                    | 6.2           | 4.1                                              | 9.9  |
|                | 500°C/4h          | 68.4              | 31.6              | 17.9             | 24.8              | 11.5                                    | 31.4                                    | 4.9           | 6.4                                              | 10.1 |
|                | 500°C/8h          | 51.3              | 48.7              | 21.5             | 22.5              | 6.6                                     | 13.6                                    | 10.2          | 1.3                                              | 6.3  |

**Table S9** Comparison of the MSR performance of the 5Cd/P25 and other reported catalysts.

| Catalysts                                               | Temperature (°C) | S/C | Pressure (MPa) | C <sub>MeOH</sub> (%) | S <sub>CO</sub> (%) | H <sub>2</sub> production rate (mmol g <sub>cat</sub> <sup>-1</sup> h <sup>-1</sup> ) | Tolerance           | References    |
|---------------------------------------------------------|------------------|-----|----------------|-----------------------|---------------------|---------------------------------------------------------------------------------------|---------------------|---------------|
| Commercial                                              | 300              | 3.1 | 0.1            | 55.0                  | 2.0                 | 100.2                                                                                 | deactivation        | <sup>1</sup>  |
| Cu/ZnO/Al <sub>2</sub> O <sub>3</sub>                   |                  |     |                |                       |                     |                                                                                       |                     |               |
| CuZnAl-R10                                              | 225              | 1.3 | 0.1            | 67.0                  | -                   | -                                                                                     | 10% loss after 40h  | <sup>2</sup>  |
| Cu/ZnO                                                  | 240              | 1.3 | 0.1            | 78.8                  | 0.2                 | 238.0                                                                                 | Stable at least 50h | <sup>3</sup>  |
| Cu-Mn spinel oxides                                     | 260              | 1.3 | 0.1            | 92.9                  | 0.7                 | 284.0                                                                                 | 5% loss after 40h   | <sup>4</sup>  |
| Cu/CeO <sub>2</sub>                                     | 260              | 1.0 | 0.1            | 90.7                  | 2.3 <sup>a</sup>    | 242.4                                                                                 | deactivation        | <sup>5</sup>  |
| Cu/ZnO/ZrO <sub>2</sub> /Al <sub>2</sub> O <sub>3</sub> | 260              | 0.3 | 0.1            | 90.0                  | 0.1                 | -                                                                                     | 10% loss after 5h   | <sup>6</sup>  |
| Cu-CoO                                                  | 240              | 1.0 | 0.1            | -                     | 9-17                | 1.0                                                                                   | -                   | <sup>7</sup>  |
| 2Pt/ $\alpha$ -MoC                                      | 190              | 2.0 | 2.0            | -                     | 0.06                | 466.6                                                                                 | deactivation        | <sup>8</sup>  |
| 0.5Zn-Pt/MoC                                            | 160              | 3.0 | 0.1            | 65.9                  | -                   | 106.9                                                                                 | deactivation        | <sup>9</sup>  |
| Ni <sub>2.4</sub> /Mo <sub>97.6</sub> C                 | 300              | 1.0 | 0.1            | 100.0                 | ~5.0                | 81.0                                                                                  | 10% loss after 50h  | <sup>10</sup> |
| Pt/TS-1                                                 | 250              | 3.0 | 0.1            | -                     | -                   | ~15.0                                                                                 | Stable at least 15h | <sup>11</sup> |
| 1Pt/NiAl <sub>2</sub> O <sub>4</sub>                    | 210              | 9.0 | 2.9            | 26.5                  | 0.05                | 26.4                                                                                  | 10% loss after 600h | <sup>12</sup> |
| 0.1%Pd/ZnAl <sub>2</sub> O <sub>4</sub>                 | 250              | 1.1 | 0.1            | ~30                   | 4.5 <sup>a</sup>    | 41.0                                                                                  | -                   | <sup>13</sup> |
| Pd/ZnO                                                  | 250              | 0.4 | 0.03           | 56.3                  | 1.9 <sup>a</sup>    | -                                                                                     | -                   | <sup>14</sup> |
| Pd/Zn <sub>0.5</sub> Ce                                 | 275              | 1.0 | 0.1            | 80.0                  | 20.0 <sup>a</sup>   | -                                                                                     | Stable at least 50h | <sup>15</sup> |
| PdZn/ZnO/Al <sub>2</sub> O <sub>3</sub>                 | 350              | 1.5 | 0.1            | 100.0                 | 1.2                 | -                                                                                     | Stable at least 30h | <sup>16</sup> |
| 5Cd/P25                                                 | 290              | 3.0 | 0.1            | 100.0                 | 0.07                | 97.7                                                                                  | Stable at           | This          |
|                                                         |                  | 1.0 | 0.1            | 92.5                  | 0.2                 | 292.9                                                                                 | least 150h          | work          |

$$^a S_{CO} = \frac{n_{CO}}{n_{CO} + n_{CO_2}} \times 100\%$$

**Table S10** Assignments of DRIFT spectroscopy peaks corresponding to surface species in the MSR reaction.

| Samples       | Adsorption peaks (cm <sup>-1</sup> )                        | Assignment                                                                      | Species                                                 |
|---------------|-------------------------------------------------------------|---------------------------------------------------------------------------------|---------------------------------------------------------|
| A<br>R<br>P25 | 1000~1100; 1300~1500;<br>2800~3000; 3700~3720               | $\nu$ (CO); $\delta_{as}$ (CH); $\nu$ (CH); $\nu$ (OH)                          | Gaseous methanol                                        |
|               | 1459                                                        | $\delta_{as}$ (CH);                                                             | Methoxy (*CH <sub>3</sub> O) adsorbed on A              |
|               | 1651                                                        | $\delta$ (OH)                                                                   | H <sub>2</sub> O adsorbed on A                          |
|               | 1340~1360; 1540~1560;<br>2860~2870; 2980~2985               | $\nu_s$ (OCO); $\nu_{as}$ (OCO); $\nu_s$ (CH); $\nu_{as}$ (CH);                 | Formate (*HCOO <sup>-</sup> ) adsorbed on A, R, and P25 |
|               | 1335~1345; 1430~1436;<br>1550~1555; 2800~2830;<br>2920~2930 | $\delta_s$ (CH); $\delta_{as}$ (CH); $\nu$ (OCO); $\nu_s$ (CH); $\nu_{as}$ (CH) | *CH <sub>3</sub> O adsorbed on Cd atoms                 |
| 5Cd/A         | 1360~1370; 1530~1545                                        | $\nu_s$ (OCO); $\nu_{as}$ (OCO)                                                 | Monodentate *HCOO <sup>-</sup> adsorbed on Cd atoms     |
| 5Cd/R         | 1390~1405; 1590~1600                                        | $\nu_s$ (OCO); $\nu_{as}$ (OCO)                                                 | Bidentate *HCOO <sup>-</sup> adsorbed on Cd atoms       |
| 5Cd/P25       | 2870~2885; 2950~2980                                        | $\nu_s$ (CH); $\nu_{as}$ (CH)                                                   | *HCOO <sup>-</sup> adsorbed on Cd atoms                 |
|               | 2113; 2170                                                  | $\nu$ (CO)                                                                      | Gaseous CO                                              |
|               | 2308; 2375                                                  | $\nu$ (CO <sub>2</sub> )                                                        | Gaseous CO <sub>2</sub>                                 |

## References

1. Jones, S. D. & Hagelin-Weaver, H. E. Steam reforming of methanol over CeO<sub>2</sub>- and ZrO<sub>2</sub>-promoted Cu-ZnO catalysts supported on nanoparticle Al<sub>2</sub>O<sub>3</sub>. *Appl. Catal. B* **90**, 195–204 (2009).
2. Li, D. *et al.* Induced activation of the commercial Cu/ZnO/Al<sub>2</sub>O<sub>3</sub> catalyst for the steam reforming of methanol. *Nat. Catal.* **5**, 99–108 (2022).
3. Wang, L. *et al.* Production of hydrogen by steam reforming of methanol over Cu/ZnO catalysts prepared via a practical soft reactive grinding route based on dry oxalate-precursor synthesis. *J. Catal.* **246**, 193–204 (2007).
4. Liu, Q. *et al.* Waste-free soft reactive grinding synthesis of high-surface-area copper–manganese spinel oxide catalysts highly effective for methanol steam reforming. *Catal. Lett.* **121**, 144–150 (2008).
5. Liu, Y. *et al.* Highly active copper/ceria catalysts for steam reforming of methanol. *Appl. Catal. A* **223**, 137–145 (2002).
6. Jeong, H. *et al.* Hydrogen production by steam reforming of methanol in a micro-channel reactor coated with Cu/ZnO/ZrO<sub>2</sub>/Al<sub>2</sub>O<sub>3</sub> catalyst. *J. Power Sources* **159**, 1296–1299 (2006).
7. Huang, X. The influence of Cr, Zn and Co additives on the performance of skeletal copper catalysts for methanol synthesis and related reactions. *Appl. Catal. A* **257**, 235–243 (2004).
8. Lin, L. *et al.* Low-temperature hydrogen production from water and methanol using Pt/ $\alpha$ -MoC catalysts. *Nature* **544**, 80–83 (2017).
9. Cai, F. *et al.* Low-temperature hydrogen production from methanol steam reforming on Zn-modified Pt/MoC catalysts. *Appl. Catal. B* **264**, (2020).
10. Ma, Y. *et al.* Catalytic Activity and stability of nickel-modified molybdenum carbide catalysts for steam reforming of methanol. *J. Phys. Chem. C* **118**, 9485–9496 (2014).
11. Wang, H. *et al.* Titanosilicate zeolite supported Pt nanoparticles with electronic metal-support interactions for efficient methanol steam reforming. *Catal. Today* **382**, 42–47 (2021).
12. Li, D. *et al.* NiAl<sub>2</sub>O<sub>4</sub> Spinel supported Pt catalyst: High performance and origin in aqueous-phase reforming of methanol. *ACS Catal.* **9**, 9671–9682 (2019).
13. Liu, L. *et al.* ZnAl<sub>2</sub>O<sub>4</sub> Spinel-Supported PdZn<sub>9</sub> catalyst with parts per million Pd for methanol steam reforming. *ACS Catal.* **12**, 2714–2721 (2022).
14. Iwasa, N. Mayanagi, T, Masuda, S. & Takezawa, N. Steam reforming of methanol over Pd-Zn Catalysts. *Catal. Lett.* **69**, 355–360 (2000).
15. Barrios, C. E., Bosco, M. V., Baltanás, M. A. & Bonivardi, A. L. Hydrogen production by methanol steam reforming: Catalytic performance of supported-Pd on zinc–cerium oxides’ nanocomposites. *Appl. Catal. B* **179**, 262–275 (2015).
16. Yan, P. *et al.* Antioxidative and stable PdZn/ZnO/Al<sub>2</sub>O<sub>3</sub> catalyst coatings concerning methanol steam reforming for fuel cell-powered vehicles. *Appl. Energy* **268**, 115043 (2020).
